# Supplementary material for: Luminescent 1D heterometallic (Ir,Cd) coordination polymers based on bis-cyclometalated Ir(iii) metallatectons and trinuclear Cd(ii) dianionic nodes
Source: Royal Society of Chemistry journal article supplement (doi:10.1039/d0dt00822b), 2021-01-01
Supplement: d0dt00822b1.pdf [file d0dt00822b1.pdf]

Electronic Supplementary Information

Luminescent 1D heterometallic (Ir,Cd) coordination polymers  
based on *bis*-cyclometalated Ir(III) metallatectons and  
trinuclear Cd(II) dianionic nodes

*Maxime Florent, Nathalie Kyritsakas, Jean-Marc Planeix, \* Aurélie Guenet, \* and Mir Wais  
Hosseini\**

Molecular Tectonics Laboratory, UMR UDS-CNRS 7140, icFRC, University of Strasbourg,  
F-67000, Strasbourg, France

|                                       |            |
|---------------------------------------|------------|
| <b>General.</b>                       | <b>S2</b>  |
| <b>Synthesis</b>                      | <b>S4</b>  |
| <b>NMR spectra of final complexes</b> | <b>S9</b>  |
| <b>Crystallographic data</b>          | <b>S14</b> |
| <b>References</b>                     | <b>S23</b> |

## **General.**

**NMR spectra** were recorded on Bruker Avance AV300 (300 MHz for  $^1\text{H}$ , 75 MHz for  $^{13}\text{C}$ , 282 MHz for  $^{19}\text{F}$ ), Bruker Avance AV400 (400 MHz for  $^1\text{H}$ , 100 MHz for  $^{13}\text{C}$ ) or Bruker Avance AV500 (500 MHz for  $^1\text{H}$ , 125 MHz for  $^{13}\text{C}$ , 470 MHz for  $^{19}\text{F}$ ) spectrometers at 20°C with complete proton decoupling for nucleus other than  $^1\text{H}$ . Chemicals shifts (in ppm) were determined relative to residual undeuterated solvent as internal reference ( $\text{CDCl}_3$ : 7.26 ppm for  $^1\text{H}$  and 77.2 ppm for  $^{13}\text{C}$ ;  $\text{CD}_3\text{CN}$ : 1.94 ppm for  $^1\text{H}$  and 118.3 ppm and 1.3 ppm for  $^{13}\text{C}$ ). Spin multiplicities are given with the following abbreviations: s (singlet), br s (broad singlet), d (doublet), dd (doublet of doublet), t (triplet), q (quadruplet), m (multiplet) and coupling constants (J) quoted in Hz.  $^1\text{H}$  NMR spectra were assigned by standard methods combined with COSY and NOESY/ROESY experiments.  $^{13}\text{C}$  spectra were assigned by standard methods combined with DEPT, HMQC and HMBC experiments.

**Mass spectrometry** was performed at the “Service de spectrométrie de masse”, Université de Strasbourg. Low and high-resolution mass spectra (positive and negative mode ESI: Electro Spray Ionization) were recorded on Thermoquest AQA Navigator® with time of flight detector.

**Elemental analyses** were performed on a Thermo Scientific Flash 2000 by the “Service d’analyses, de mesures physiques et de spectroscopie optique”, Université de Strasbourg.

**X-ray crystal structure data** were collected on a Bruker SMART CCD diffractometer with Mo-K $\alpha$  radiation. The structures were solved and refined using the Bruker SHELXTL Software Package using SHELXS-97 (Sheldrick, 2008) and refined by full matrix least squares on  $F^2$  using SHELXL-97 (Sheldrick, 2014) with anisotropic thermal parameters for all non-hydrogen atoms.<sup>1,2</sup> The hydrogen atoms were introduced at calculated positions and not refined (riding model). CCDC 1980611-1980615 and 1980617-1980621 contains the supplementary crystallographic data for this paper. These data can be obtained free of charge from the Cambridge Crystallographic Data Centre via [www.ccdc.cam.ac.uk/data\\_request/cif](http://www.ccdc.cam.ac.uk/data_request/cif).

**Powder X-ray diffraction (PXRD) patterns** were recorded on a Bruker D8 AV diffractometer using Cu-K $\alpha$  radiation ( $\lambda = 1.5406 \text{ \AA}$ ) operating at 40 kV and 40 mA with a scanning range between 3.8 and 50° by a scan step size of 2°/min. For comparison, simulated patterns were calculated using the Mercury software.

**UV/vis spectra** in solution and in the solid state were recorded on a PerkinElmer Lambda 650S spectrophotometer (spectra in the solid state recorded in the reflection mode, using a 150 mm integrating sphere and Spectralon© as light spectral reference for the reflection

corrections). Wavelengths are given in nm and molar absorption coefficients ( $\epsilon$ ) are given in  $\text{L}\cdot\text{mol}^{-1}\cdot\text{cm}^{-1}$ . Spectrophotometric grade solvents were used for measurements.

**Steady state emission spectra** of the discrete complexes were recorded in the solid state (powder samples) on a PicoQuant FluoTime 300 (PicoQuant GmbH, Germany) and corrected by standard correction curves. Time-resolved measurements were performed using either the time-correlated single-photon counting (TCSPC) electronics PicoHarp300 or the Multi-Channel Scaling (MCS) electronics NanoHarp 250 of the PicoQuant FluoTime 300 (PicoQuant GmbH, Germany), equipped with a PDL 820 laser pulse driver. A pulsed laser diode LDH-P-C-405 ( $\lambda = 405$  nm, pulse FWHM  $<50$  ps, repetition rate 200 kHz – 40 MHz) was used to excite the sample and mounted directly on the sample chamber at  $90^\circ$ . The photons were collected by a PMA-C-192 photomultiplier (PMT) single-photon-counting detector. The data were acquired by using the commercially available software EasyTau (PicoQuant GmbH, Germany), while data analysis was performed using the commercially available software FluoFit (PicoQuant GmbH, Germany). The absolute photoluminescence quantum yields (PLQY) of solids were measured on a Hamamatsu Quantaaurus-QY integrating sphere in air-equilibrated condition at room temperature using scan mode (300-400 nm, 10 nm step). Steady-state emission spectra of the coordination polymers were recorded in the solid state (powder samples) on a PerkinElmer LS55 spectrometer equipped with a Hamamatsu R928 photomultiplier tube. Emission and excitation spectra were corrected for source intensity (lamp and grating) and emission spectral response (detector and grating) by standard correction curves.

**Synthesis.** All air sensitive and anhydrous reactions were carried out under argon. Light sensitive reactions were protected from light by covering with aluminium foil. The glassware was oven dried at  $100^\circ\text{C}$  and cooled under argon flow. Commercially available chemicals were used without further purification. Anhydrous toluene, dichloromethane and  $\text{CH}_3\text{CN}$  were used as supplied by commercial sources without further purification.

## Synthesis

### FppyH

According to the procedure already reported,<sup>3</sup> 2-bromopyridine (0.9 ml, 9.52 mmol, 1 eq), 4-fluorophenylboronic acid (2.00 g, 14.28 mmol, 1.5 eq), Pd(PPh<sub>3</sub>)<sub>4</sub> (110 mg, 0.095 mmol, 0.01 eq) and K<sub>2</sub>CO<sub>3</sub> (2.62 g, 18.0 mmol, 1.9 eq) were reacted together under argon in EtOH (40 mL). The work up procedure was slightly modified. The dark reaction mixture obtained after reaction was evaporated to dryness, dissolved in CH<sub>2</sub>Cl<sub>2</sub> (100 ml) and washed with water (2 x 50 ml). The crude product was purified by Kugelrohr distillation (125 °C, 0.56 mbar). A colorless solid was obtained (1.60 g, 97 %).

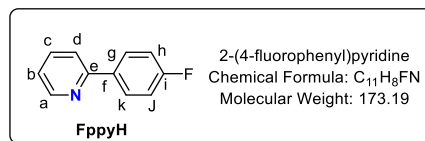

<sup>1</sup>H NMR (CDCl<sub>3</sub>, 500 MHz, CDCl<sub>3</sub>) δ (ppm): 8.67 (dt, J = 4.8, 1.4 Hz, 1H), 8.01 - 7.94 (m, 2H), 7.75 (td, J = 7.7, 1.8 Hz, 1H), 7.68 (dt, J = 8.1, 1.2 Hz, 1H), 7.23 (ddd, J = 7.4, 4.9, 1.2 Hz, 1H), 7.15 (m, 2H).

<sup>19</sup>F NMR (470 MHz, CDCl<sub>3</sub>) δ (ppm): -113.2 (s).

<sup>13</sup>C NMR (125 MHz, CDCl<sub>3</sub>) δ (ppm): 163.6 (d, <sup>1</sup>J<sub>C-F</sub> = 248.4 Hz, C<sub>quat</sub>), 156.6 (C<sub>quat</sub>), 149.8 (CH), 137.0 (CH), 135.5 (d, <sup>4</sup>J<sub>C-F</sub> = 3.1 Hz, C<sub>quat</sub>), 128.7 (d, <sup>3</sup>J<sub>C-F</sub> = 8.4 Hz, CH), 122.2 (CH), 120.4 (CH), 115.6 (d, <sup>2</sup>J<sub>C-F</sub> = 21.6 Hz, CH).

MS (ESI<sup>+</sup>): calcd for [M+H]<sup>+</sup> (C<sub>11</sub>H<sub>9</sub>FN) 174.0714, found 174.0718

L2 was synthesized as previously described in 69 % yield.<sup>4</sup>

<sup>1</sup>H NMR (CDCl<sub>3</sub>, 500 MHz) δ (ppm): 8.70 (d, 2H, <sup>4</sup>J = 2.4 Hz, H<sub>6</sub>), 8.29 (d, 2H, <sup>3</sup>J = 8.6 Hz, H<sub>3</sub>), 7.93 (dd, 2H, <sup>3</sup>J = 8.6 Hz, <sup>4</sup>J = 2.4 Hz, H<sub>4</sub>).

<sup>13</sup>C NMR (CDCl<sub>3</sub>, 125 MHz) δ (ppm): 153.8 (C<sub>quat</sub>), 150.4 (CH), 139.7 (CH), 122.3 (CH), 121.5 (C<sub>quat</sub>)

IR: ν cm<sup>-1</sup> 1544, 1455 (C=N), 1357, 1261, 1233, 1124, 1087, 1007, 827, 801, 726, 702, 638 (C-Br).

Elem. Anal. Calcd for C<sub>10</sub>H<sub>6</sub>Br<sub>2</sub>N<sub>2</sub>: C, 38.25, H, 1.93, N, 8.92. Found: C, 38.16, H, 2.12, N, 8.57.

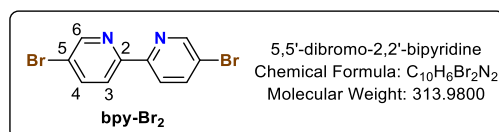

[Ir(ppy)<sub>2</sub>(μ-Cl)]<sub>2</sub> was synthesized as previously described in 76 % yield.<sup>5</sup>

<sup>1</sup>H NMR (CDCl<sub>3</sub>, 300 MHz) δ (ppm): 9.24 (dd, 4H, <sup>3</sup>J = 5.7 Hz, <sup>4</sup>J = 1.0 Hz), 7.86 (d, 4H, <sup>3</sup>J = 7.8 Hz), 7.73 (td, 4H, <sup>3</sup>J = 7.5 Hz, <sup>4</sup>J = 1.5 Hz), 7.48 (dd, 4H, <sup>3</sup>J = 7.8 Hz, <sup>4</sup>J = 1.2 Hz), 6.73-6.78 (m, 8H), 6.56 (ddd, 4H, <sup>3</sup>J = 8.0 Hz, <sup>3</sup>J = 8.0 Hz, <sup>4</sup>J = 1.4 Hz), 5.93 (dd, 4H, <sup>3</sup>J = 7.7 Hz, <sup>4</sup>J = 1.0 Hz).

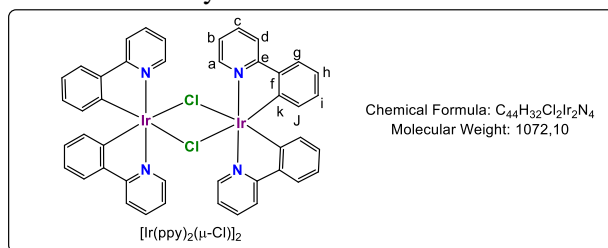

<sup>13</sup>C NMR (CDCl<sub>3</sub>, 75 MHz) δ (ppm): 168.6 (C<sub>quat</sub>), 151.7 (CH), 145.4 (C<sub>quat</sub>), 143.7 (C<sub>quat</sub>), 136.1 (CH), 130.6 (CH), 124.1 (CH), 123.7 (CH), 122.1 (CH), 121.3 (CH) 118.3 (CH).

[Ir(Fppy)<sub>2</sub>(μ-Cl)]<sub>2</sub>:

The reaction was performed under argon. The solvents were degassed by bubbling argon prior to reaction. IrCl<sub>3</sub>·xH<sub>2</sub>O (518 mg, 1.47 mmol, trihydrate basis, MW = 352.6) and FppyH (560 mg, 3.23 mmol, 2.2 eq) were dissolved into a 2-EtOEtOH/H<sub>2</sub>O mixture (21 mL/7 mL) and the resulting

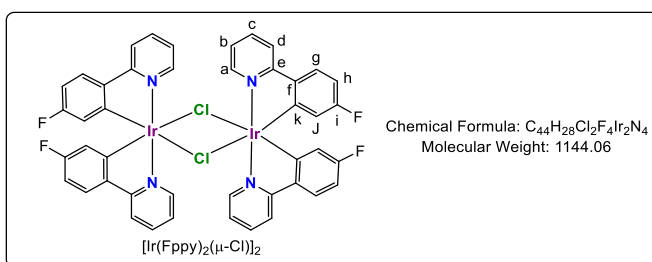

solution was heated at 120 °C overnight. After cooling, the yellow precipitate was filtered and washed successively with EtOH (10 mL), H<sub>2</sub>O (10 mL), EtOH (10 mL), Et<sub>2</sub>O (10 mL). The fine yellow powder was dried and used without further purification (612 mg, 73 %).

**<sup>1</sup>H NMR (CDCl<sub>3</sub>, 300 MHz)** δ (ppm): 9.13 (ddd, 4H, <sup>3</sup>J = 5.8 Hz, <sup>4</sup>J = 1.5 Hz, <sup>5</sup>J = 0.9 Hz, H<sub>a</sub>), 7.88-7.69 (m, 8H, H<sub>c</sub> and H<sub>d</sub>), 7.50 (dd, 4H, <sup>3</sup>J = 8.6 Hz, <sup>4</sup>J<sub>H-F</sub> = 5.7 Hz, H<sub>e</sub>), 6.80 (ddd, 4H, <sup>3</sup>J = 7.2 Hz, <sup>3</sup>J = 5.8 Hz, <sup>4</sup>J = 1.5 Hz, H<sub>b</sub>), 6.56 (td, 4H, <sup>3</sup>J = 8.7 Hz, <sup>3</sup>J<sub>H-F</sub> = 8.7 Hz, <sup>4</sup>J = 2.5 Hz, H<sub>h</sub>), 5.53 (dd, 4H, <sup>3</sup>J<sub>H-F</sub> = 10.0 Hz, <sup>4</sup>J = 2.5 Hz, H<sub>j</sub>).

**<sup>19</sup>F NMR (CDCl<sub>3</sub>, 282 MHz)** δ (ppm) -110.4 (s).

**<sup>13</sup>C NMR (CDCl<sub>3</sub>, 75 MHz)** δ (ppm): 167.4 (C<sub>quat</sub>), 162.8 (d, <sup>1</sup>J<sub>C-F</sub> = 243.5 Hz, C<sub>quat</sub>), 151.32 (CH), 147.3 (C<sub>quat</sub>), 139.9 (d, J<sub>C-F</sub> = 1.9 Hz, C<sub>quat</sub>), 136.7 (CH), 125.4 (d, J<sub>C-F</sub> = 9.7 Hz, CH), 122.2 (CH), 118.6 (CH) 116.6 (d, J<sub>C-F</sub> = 18.4 Hz, CH), 108.9 (d, J<sub>C-F</sub> = 23.2 Hz, CH).

**MS (ESI<sup>+</sup>):** calcd for [M]<sup>+</sup> (C<sub>44</sub>H<sub>28</sub>Cl<sub>2</sub>F<sub>4</sub>Ir<sub>2</sub>N<sub>4</sub>) 1144.09, found 1144.08.

[Ir(dFppy)<sub>2</sub>(μ-Cl)]<sub>2</sub> was synthesized following the reported procedure in 71% yield.<sup>6</sup>

**<sup>1</sup>H NMR (CDCl<sub>3</sub>, 300 MHz)** δ (ppm): 9.12 (dd, 4H, J = 5.7 Hz, J = 1.0 Hz), 8.31 (d, 4H, J = 8.3 Hz), 7.83 (td, 4H, J = 7.8 Hz, J = 1.3 Hz), 6.83 (ddd, 4H, <sup>3</sup>J<sub>H-H</sub> = 7.2 Hz, <sup>3</sup>J<sub>H-H</sub> = 7.2 Hz, <sup>4</sup>J<sub>H-H</sub> = 1.2 Hz), 6.33 (ddd, 4H, <sup>3</sup>J<sub>H-F</sub> = 12.6 Hz, <sup>3</sup>J<sub>H-F</sub> = 9.2 Hz, <sup>4</sup>J<sub>H-H</sub> = 2.4 Hz), 5.28 (dd, 4H, <sup>3</sup>J<sub>H-F</sub> = 9.3 Hz, <sup>4</sup>J<sub>H-H</sub> = 2.4 Hz).

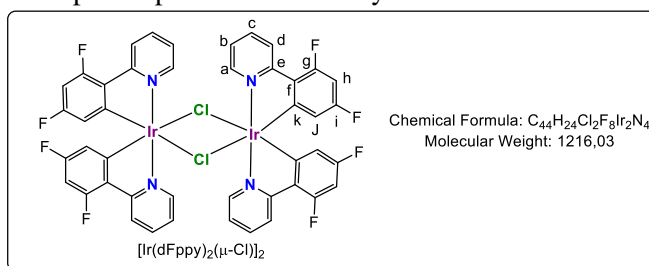

**<sup>19</sup>F NMR (CDCl<sub>3</sub>, 282 MHz)** δ (ppm): -107.72 (d, 4F, <sup>4</sup>J<sub>F-F</sub> = 10.2 Hz), -110.32 (d, 4F, <sup>4</sup>J<sub>F-F</sub> = 10.2 Hz).

**<sup>13</sup>C NMR (CDCl<sub>3</sub>, 125 MHz)** δ (ppm): 165.3 (d, <sup>2</sup>J<sub>C-F</sub> = 6.7 Hz, C<sub>quat</sub>), 162.4 (dd, <sup>1</sup>J<sub>C-F</sub> = 253.5 Hz, <sup>3</sup>J<sub>C-F</sub> = 12.9 Hz, C<sub>quat</sub>), 160.4 (dd, <sup>1</sup>J<sub>C-F</sub> = 253.5 Hz, <sup>3</sup>J<sub>C-F</sub> = 12.9 Hz, C<sub>quat</sub>), 151.3 (CH), 147.6 (d, <sup>3</sup>J<sub>C-F</sub> = 7.1 Hz, C<sub>quat</sub>), 137.6 (CH), 127.8 (C<sub>quat</sub>), 122.7 (d, <sup>4</sup>J<sub>C-F</sub> = 19.9 Hz, CH), 122.6 (CH), 112.7 (d, <sup>2</sup>J<sub>C-F</sub> = 18.2 Hz, CH), 98.2 (t, <sup>2</sup>J<sub>C-F</sub> = 26.5 Hz, CH).

**Elem. Anal:** calcd for C<sub>44</sub>H<sub>32</sub>Cl<sub>2</sub>Ir<sub>2</sub>N<sub>4</sub>·H<sub>2</sub>O: C, 42.83, H, 2.12, N, 4.54. Found: C, 42.65, H, 2.20, N, 4.23.

[Ir(ppy)<sub>2</sub>(L2)][PF<sub>6</sub>] was synthesised adapting the procedure described for similar compounds.<sup>7</sup>

To a solution of [Ir(ppy)<sub>2</sub>(μ-Cl)]<sub>2</sub> (50 mg, 0.047 mmol, 1 eq) in a 1/1 MeOH/DCM mixture (3 mL/3 mL) was added L2 (34 mg, 0.108 mmol, 2.3 eq). The yellow solution was heated at 60 °C overnight. Water (50 mL) was then added and the resulting solution was washed with diethyl ether (2x30 mL). The aqueous layer was heated to 70 °C and a solution of KPF<sub>6</sub> (100 mg in 5 mL water) was added. A yellow precipitate formed immediately. The aqueous solution was cooled using an ice bath for 2 hours, then filtered and washed with water (5 mL) and Et<sub>2</sub>O (5 mL). The product was obtained as an orange powder (75 mg, 83%) by recrystallization from acetonitrile (2 mL) and diethyl ether (20 mL).

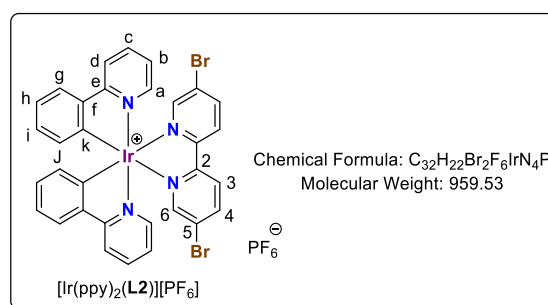

**<sup>1</sup>H NMR (CD<sub>3</sub>CN, 300 MHz)** δ (ppm): 8.40 (d, 2H, <sup>3</sup>J = 8.7 Hz, H<sub>3</sub>), 8.29 (dd, 2H, <sup>3</sup>J = 8.8 Hz, <sup>4</sup>J = 2.2 Hz, H<sub>4</sub>), 8.07 (d, <sup>3</sup>J = 8.1 Hz, H<sub>d</sub>), 7.91 (d, 2H, <sup>4</sup>J = 1.9 Hz, H<sub>6</sub>), 7.87 (m, 2H, H<sub>c</sub>), 7.82 (dd, 2H, <sup>3</sup>J = 7.8 Hz, <sup>4</sup>J = 0.9 Hz, H<sub>g</sub>), 7.65 (m, 2H, H<sub>a</sub>), 7.09-7.04 (m, 4H, H<sub>b</sub>, H<sub>h</sub>), 6.94 (td, 2H, <sup>4</sup>J = 7.4 Hz, <sup>3</sup>J = 1.3 Hz, H<sub>i</sub>), 6.25 (dd, 2H, <sup>3</sup>J = 7.6 Hz, <sup>4</sup>J = 1.3 Hz, H<sub>j</sub>).

**<sup>13</sup>C NMR (CD<sub>3</sub>CN, 125 MHz)** δ (ppm): 167.9 (C<sub>quat</sub>), 154.9 (C<sub>quat</sub>), 152.5 (CH), 150.6 (CH), 149.7 (C<sub>quat</sub>), 145.0 (C<sub>quat</sub>), 142.9 (CH), 139.7 (CH), 132.4 (CH), 131.4 (CH), 126.9 (CH), 125.9 (CH), 125.7 (C<sub>quat</sub>), 124.6 (CH), 123.9 (CH), 121.0 (CH).

**MS (ESI<sup>+</sup>):** calcd for [M-PF<sub>6</sub>]<sup>+</sup> (C<sub>32</sub>H<sub>22</sub>Br<sub>2</sub>Ir<sub>1</sub>N<sub>4</sub>) 812.98, found 812.98

**UV-Visible** (CH<sub>2</sub>Cl<sub>2</sub>) λ (nm), ε (10<sup>3</sup> L.mol<sup>-1</sup>.cm<sup>-1</sup>): 268 (48.4), 288 (38.9), 331 (24.0), 380 (7.0), 401 (5.8).

[Ir(Fppy)<sub>2</sub>(L2)][PF<sub>6</sub>]:

To a solution of [Ir(Fppy)<sub>2</sub>(μ-Cl)]<sub>2</sub> (500 mg, 0.45 mmol, 1 eq) in a mixture of MeOH/CH<sub>2</sub>Cl<sub>2</sub> (20 mL/20 mL) was added L2 (295 mg, 0.94 mmol, 2.1 eq). The yellow solution was heated at 60 °C overnight. After evaporation to dryness, the mixture was dissolved in MeOH (50 mL) and heated at 70 °C. An aqueous KPF<sub>6</sub> solution (sat) (10 mL) was added. A yellow precipitate formed immediately. The suspension was placed in an ice bath for 2 hours before it was filtered, washed with H<sub>2</sub>O (10 mL) and Et<sub>2</sub>O (10 mL). The desired compound was obtained as a yellow powder (815 mg, 91 %).

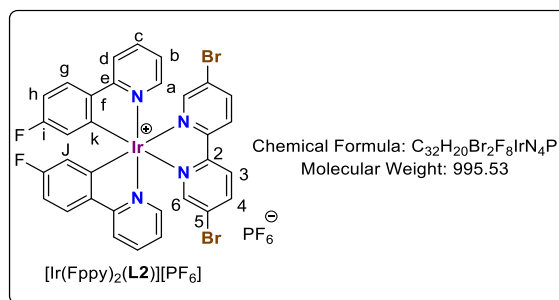

**<sup>1</sup>H NMR (CD<sub>3</sub>CN, 300 MHz)** δ (ppm): 8.40 (d, 2H, <sup>3</sup>J<sub>H-H</sub> = 8.6 Hz, H<sub>3</sub>), 8.31 (dd, 4H <sup>3</sup>J = 8.8 Hz, <sup>4</sup>J<sub>H-H</sub> = 2.2 Hz, H<sub>4</sub>), 8.05 (d, 2H, <sup>3</sup>J<sub>H-H</sub> = 8.2 Hz, H<sub>a</sub>) 7.86-7.93 (m, 6H, H<sub>6</sub>, H<sub>b</sub>, H<sub>g</sub>), 7.62 (d, 2H, <sup>3</sup>J<sub>H-H</sub> = 5.7 Hz, H<sub>d</sub>), 7.07 (ddd, 2H, <sup>3</sup>J<sub>H-H</sub> = 7.4 Hz, <sup>3</sup>J = 5.9 Hz, <sup>4</sup>J<sub>H-H</sub> = 1.5 Hz, H<sub>c</sub>), 6.85 (td, 2H, <sup>3</sup>J<sub>H-F</sub> = 8.9 Hz, <sup>4</sup>J<sub>H-H</sub> = 2.6 Hz, H<sub>h</sub>), 5.85 (dd, 2H, <sup>3</sup>J<sub>H-F</sub> = 9.5 Hz, <sup>4</sup>J<sub>H-H</sub> = 2.6 Hz, H<sub>j</sub>).

**<sup>19</sup>F NMR (CD<sub>3</sub>CN, 282 MHz)** δ (ppm): -73.9 (d, 6F, <sup>1</sup>J<sub>P-F</sub> = 707 Hz, PF<sub>6</sub>), -111.6 (s, 2F).

**<sup>13</sup>C NMR (CD<sub>3</sub>CN, 125 MHz)** δ (ppm): 166.8 (C<sub>quat</sub>), 164.4 (d, <sup>1</sup>J<sub>C-F</sub> = 252.8 Hz, C<sub>quat</sub>) 154.7 (C<sub>quat</sub>), 152.6 (CH), 152.5 (d, J<sub>C-F</sub> = 5.9 Hz, C<sub>quat</sub>), 150.7 (CH), 143.2 (CH), 141.4 (d, J<sub>C-F</sub> = 2.0 Hz, C<sub>quat</sub>), 140.0 (CH), 128.2 (d, J<sub>C-F</sub> = 9.5 Hz, CH), 126.9 (CH), 125.8 (C<sub>quat</sub>), 124.5 (CH), 121.2 (CH), 117.9 (d, J<sub>C-F</sub> = 18.2 Hz, CH), 110.9 (d, J<sub>C-F</sub> = 23.3 Hz, CH).

**HRMS (ESI<sup>+</sup>):** calcd for [M-PF<sub>6</sub>]<sup>+</sup> C<sub>32</sub>H<sub>20</sub>Br<sub>2</sub>F<sub>2</sub>Ir<sub>1</sub>N<sub>4</sub> 850.96, found 850.96.

**UV-Visible** (THF): λ (nm), ε (10<sup>3</sup> L.mol<sup>-1</sup>.cm<sup>-1</sup>) 269 (43.4), 317 (24.4), 328 (22.5, s), 365 (6.9) (s).

[Ir(dFppy)<sub>2</sub>(L2)][PF<sub>6</sub>] was synthesized as previously reported.<sup>8</sup>

To a solution of [Ir(dFppy)<sub>2</sub>(μ-Cl)]<sub>2</sub> (0.22 g, 0.18 mmol, 1 eq) in a mixture of MeOH/CH<sub>2</sub>Cl<sub>2</sub> (5 mL/5 mL), L2 (0.12 g, 0.37 mmol, 2.05 eq) was added. The yellow solution was heated at 60 °C overnight. After cooling, water (30 mL) was added and the aqueous layer was washed with Et<sub>2</sub>O (2x30 mL). After heating the aqueous layer at 70 °C, an aqueous KPF<sub>6</sub> solution (100 mg in 5 mL H<sub>2</sub>O) was added. A yellow precipitate formed immediately, and the suspension was placed in an ice bath for 2 hours. The suspension was filtered, washed with H<sub>2</sub>O (5 mL) and ether (5 mL). The desired compound was obtained as a yellow powder (0.23 g, 60 %) after recrystallization from acetonitrile (2 mL) and diethylether (20 mL).

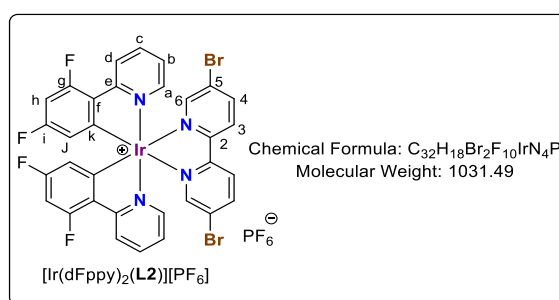

**<sup>1</sup>H NMR (CD<sub>3</sub>CN, 300 MHz)** δ (ppm): 8.43 (d, 2H, <sup>3</sup>J = 8.6 Hz, H<sub>3</sub>), 8.34-8.31 (m, 4H, H<sub>4</sub>, H<sub>a/d</sub>), 7.96-7.91 (m, 4H, H<sub>6</sub> and H<sub>b/c</sub>), 7.67 (d, 2H, <sup>3</sup>J = 5.7 Hz, H<sub>a/d</sub>), 7.11 (ddd, 2H, <sup>3</sup>J = 7.5 Hz, <sup>3</sup>J = 5.8 Hz, <sup>4</sup>J = 1.3 Hz, H<sub>b/c</sub>), 6.71 (ddd, 2H, <sup>3</sup>J<sub>H-F</sub> = 12.4 Hz, <sup>3</sup>J<sub>H-F</sub> = 9.0 Hz, <sup>4</sup>J = 2.5 Hz, H<sub>h</sub>), 5.68 (dd, 2H, <sup>3</sup>J<sub>H-F</sub> = 8.8 Hz, <sup>4</sup>J = 2.3 Hz, H<sub>j</sub>).

**<sup>19</sup>F NMR (CD<sub>3</sub>CN, 282 MHz)** δ (ppm): -73.9 (d, 6F, <sup>1</sup>J<sub>P-F</sub> = 706 Hz, PF<sub>6</sub>), -108.8 (d, 2F, <sup>4</sup>J<sub>F-F</sub> = 10.7 Hz), -110.7 (d, 2F, <sup>4</sup>J<sub>F-F</sub> = 10.7 Hz).

**<sup>13</sup>C NMR (CD<sub>3</sub>CN, 125 MHz)** δ (ppm): 164.3 (dd, <sup>1</sup>J<sub>C-F</sub> = 253 Hz, <sup>2</sup>J<sub>C-F</sub> = 13.3 Hz, C<sub>g/i</sub>), 164.3 (d, J<sub>C-F</sub>

= 7.0 Hz,  $C_{e/f}$ ), 162.1 (dd,  $^1J_{C-F} = 260$  Hz,  $^2J_{C-F} = 12.7$  Hz,  $C_{g/i}$ ), 154.6 ( $C_5$ ), 153.4 (d,  $J_{C-F} = 6.7$  Hz,  $C_{e/f}$ ), 152.7 ( $C_6$ ), 151.0 ( $C_{a/d}$ ), 143.6 ( $C_4$ ), 140.6 ( $C_{b/c}$ ), 129.0 ( $C_k$ ), 127.0 ( $C_3$ ), 126.0 ( $C_2$ ), 124.9 ( $C_{a/b/c/d}$ ), 124.8 ( $C_{a/b/c/d}$ ), 114.8 (dd,  $^3J_{C-F} = 18.1$  Hz,  $^4J_{C-F} = 2.3$  Hz,  $C_j$ ), 100.1 (t,  $^3J_{C-F} = 26.8$  Hz,  $C_h$ ).

**HRMS (ESI<sup>+</sup>):** calcd for  $[M-PF_6]^+ C_{32}H_{18}Br_2F_4Ir_1N_4$  884.9419, found 884.9308.

**UV-Visible** (THF):  $\lambda$  (nm),  $\epsilon$  ( $10^3$  L.mol<sup>-1</sup>.cm<sup>-1</sup>) 271 (63.1), 308 (s, 36.1), 330 (s, 23.8), 363 (s, 7.7).

### General procedure for the Suzuki-coupled pyridyl derivatives:

To a solution of  $[Ir(Xppy)_2(L_2)][PF_6]$  ( $Xppy = ppy, Fppy$  or  $dFppy$ ) (1eq) in a mixture of toluene/EtOH/H<sub>2</sub>O/CH<sub>3</sub>CN (1/1/1/1) was added 3-pyridinylboronic acid (2.2 eq). After degassing the resulting yellow solution with argon, Pd(PPh<sub>3</sub>)<sub>4</sub> (0.22 eq) and K<sub>2</sub>CO<sub>3</sub> (5.22 eq) were added and the solution was heated at 100 °C overnight. After filtration, CH<sub>2</sub>Cl<sub>2</sub> (20 to 40 mL) was added and the organic layer was washed with water (2x 10 to 20 mL) and evaporated to dryness. Recrystallization by vapor diffusion of Et<sub>2</sub>O into a CH<sub>3</sub>CN or CHCl<sub>3</sub> solution containing the desired product afforded the different complexes as red to yellow solids.

$[Ir(ppy)_2(L_1)][PF_6]$ :

$[Ir(ppy)_2(L_2)][PF_6]$  (200 mg, 0.210 mmol), 3-pyridinylboronic acid (56 mg, 0.456 mmol), Pd(PPh<sub>3</sub>)<sub>4</sub> (50 mg, 0.44 mmol) and K<sub>2</sub>CO<sub>3</sub> (140 mg, 1.01 mmol) were reacted together in a mixture of toluene/EtOH/H<sub>2</sub>O/CH<sub>3</sub>CN (40 mL) according to the general procedure described above. Recrystallization by slow diffusion of Et<sub>2</sub>O (40 mL) into a CH<sub>3</sub>CN solution (5 mL) afforded  $[Ir(ppy)_2(L_1)][PF_6]$  as a red solid (177 mg, 88 %). Single crystals suitable for X-Ray diffraction were obtained by vapour diffusion of Et<sub>2</sub>O (20 mL) into an acetonitrile solution containing the Ir complex (20 mg in 2 mL).

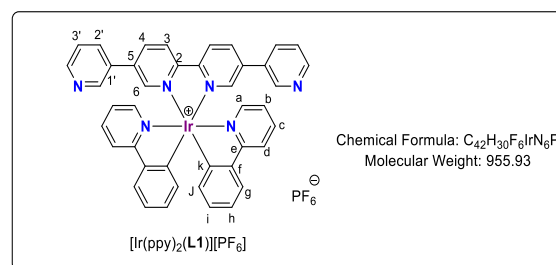

**<sup>1</sup>H NMR** (CD<sub>3</sub>CN, 400 MHz)  $\delta$  (ppm): 8.67 (d, 2H,  $^3J = 8.6$  Hz), 8.63 (dd, 2H,  $^3J = 4.8$  Hz,  $^4J = 1.6$  Hz), 8.57 (dd, 2H,  $^4J = 2.4$  Hz,  $^4J = 0.9$  Hz), 8.43 (dd, 2H,  $^3J = 8.5$  Hz,  $^4J = 2.2$  Hz), 8.19 (dd, 2H,  $^4J = 2.1$  Hz,  $^4J = 0.7$  Hz), 8.09 (dt, 2H,  $^3J = 8.2$  Hz,  $^4J = 1.2$  Hz), 7.87 (m, 4H), 7.79 (m, 4H), 7.45 (ddd, 2H,  $^3J = 8.0$  Hz,  $J = 4.9$  Hz,  $^4J = 0.9$  Hz), 7.08 (m, 4H), 6.98 (td, 2H,  $^3J = 7.4$  Hz,  $^4J = 1.3$  Hz), 6.40 (dd, 2H,  $^3J = 7.6$  Hz,  $^4J = 1.1$  Hz).

**<sup>13</sup>C NMR** (CD<sub>3</sub>CN, 100 MHz)  $\delta$  (ppm): 168.2 ( $C_{quat}$ ), 155.6 ( $C_{quat}$ ), 151.4 (CH), 150.9 ( $C_{quat}$ ), 150.5 (CH), 149.5 (CH), 148.6 (CH), 145.2 ( $C_{quat}$ ), 139.5 (CH), 138.7 ( $C_{quat}$ ), 138.1 (CH), 135.3 (CH), 132.6 (CH), 131.8 ( $C_{quat}$ ), 131.3 (CH), 125.9 (CH), 125.0 (CH), 124.6 (CH), 124.5 (CH), 123.6 (CH), 120.9 (CH).

**MS (ESI<sup>+</sup>):** calcd for  $[M-PF_6]^+ C_{42}H_{30}Ir_1N_6$  811.23, found 811.22.

**UV-Visible** (THF):  $\lambda$  (nm),  $\epsilon$  ( $10^3$  L.mol<sup>-1</sup>.cm<sup>-1</sup>) 256 (47.5), 266 (46.9), 296 (43.3), 338 (40.0), 405 (5.4).

$[Ir(Fppy)_2(L_1)][PF_6]$ :

$[Ir(Fppy)_2(L_2)][PF_6]$  (200 mg, 0.210 mmol), 3-pyridinylboronic acid (54 mg, 0.44 mmol), Pd(PPh<sub>3</sub>)<sub>4</sub> (51 mg, 0.44 mmol) and K<sub>2</sub>CO<sub>3</sub> (140 mg, 1.05 mmol) were reacted together in a mixture of toluene/EtOH/H<sub>2</sub>O/CH<sub>3</sub>CN (40 mL) according to the general procedure described above. Recrystallization by diffusion of Et<sub>2</sub>O (40 mL) into a CH<sub>3</sub>CN solution (5 mL) afforded  $[Ir(Fppy)_2(L_1)][PF_6]$  as an orange solid (159 mg, 82 %). Single crystals suitable for X-Ray diffraction were obtained by vapour diffusion

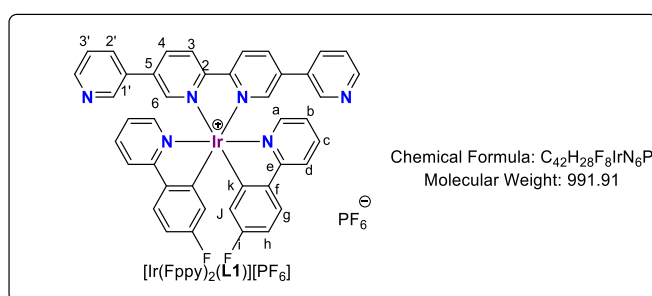

of Et<sub>2</sub>O (20 mL) into an acetonitrile solution containing the Ir complex (20 mg in 3 mL).

**<sup>1</sup>H NMR (CD<sub>3</sub>CN, 400 MHz) δ (ppm):** 8.68 (d, 2H, <sup>3</sup>J = 8.6 Hz), 8.64 (m, 4H), 8.45 (dd, 2H, <sup>3</sup>J = 8.5 Hz, <sup>4</sup>J = 2.2 Hz), 8.17 (d, 2H, <sup>4</sup>J = 2.2 Hz), 8.04 (dt, 2H, <sup>3</sup>J = 8.2 Hz, <sup>4</sup>J = 1.1 Hz), 7.88 (m, 6H), 7.74 (m, 2H), 7.52 (ddd, 2H, <sup>3</sup>J = 8.0 Hz, J = 4.9 Hz, <sup>4</sup>J = 0.8 Hz), 7.07 (ddd, 2H, <sup>3</sup>J = 7.4 Hz, <sup>4</sup>J = 5.8 Hz, <sup>4</sup>J = 1.4 Hz), 6.85 (td, 2H, <sup>3</sup>J = 8.9 Hz, <sup>4</sup>J = 2.6 Hz), 5.96 (dd, 2H, <sup>3</sup>J = 9.5 Hz, <sup>4</sup>J = 2.6 Hz).

**<sup>19</sup>F NMR (CD<sub>3</sub>CN, 282 MHz) δ (ppm):** -73.9 (d, 6F, <sup>1</sup>J<sub>P-F</sub> = 707 Hz, PF<sub>6</sub>), -111.7 (s, 2F).

**<sup>13</sup>C NMR (CD<sub>3</sub>CN, 100 MHz) δ (ppm):** 166.2 (C<sub>quat</sub>), 163.7 (d, <sup>1</sup>J<sub>C-F</sub> = 253 Hz, C<sub>quat</sub>), 154.7 (C<sub>quat</sub>), 152.7 (d, J<sub>C-F</sub> = 5.8 Hz, C<sub>quat</sub>), 149.7 (CH), 149.3 (CH), 148.8 (CH), 146.8 (CH), 140.7 (C<sub>quat</sub>), 138.9 (CH), 137.7 (CH), 137.6 (C<sub>quat</sub>), 135.9 (CH), 131.4 (C<sub>quat</sub>), 127.2 (d, J<sub>C-F</sub> = 9.3 Hz, CH), 125.2 (CH), 124.6 (CH), 123.6 (CH), 120.3 (CH), 117.6 (d, <sup>1</sup>J<sub>C-F</sub> = 18.1 Hz, CH), 109.9 (d, J<sub>C-F</sub> = 23.2 Hz, CH).

**MS (ESI<sup>+</sup>):** calcd for [M-PF<sub>6</sub>]<sup>+</sup> C<sub>42</sub>H<sub>28</sub>F<sub>2</sub>Ir<sub>1</sub>N<sub>6</sub> 847.20, found 847.19.

**UV-Visible (THF):** λ (nm), ε (10<sup>3</sup> L.mol<sup>-1</sup>.cm<sup>-1</sup>) 253 (45.4), 268 (44.7), 293 (39.8), 340 (36.6), 396 (5.1) (s).

[Ir(dFppy)<sub>2</sub>(L1)][PF<sub>6</sub>]:

[Ir(dFppy)<sub>2</sub>(L2)][PF<sub>6</sub>] (200 mg, 0.19 mmol), 3-pyridinylboronic acid (52 mg, 0.42 mmol), Pd(PPh<sub>3</sub>)<sub>4</sub> (51 mg, 0.044 mmol) and K<sub>2</sub>CO<sub>3</sub> (140 mg, 1.05 mmol) were reacted together in a mixture of toluene/EtOH/H<sub>2</sub>O/CH<sub>3</sub>CN (40 mL) according to the general procedure described above. Recrystallization by diffusion

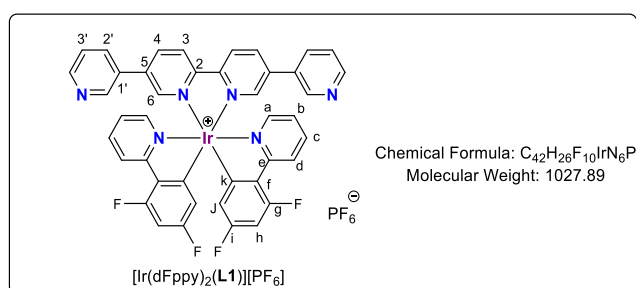

of Et<sub>2</sub>O (50 mL) into a CHCl<sub>3</sub> solution (5 mL) afforded [Ir(dFppy)<sub>2</sub>(L1)][PF<sub>6</sub>] as an orange solid (150 mg, 77 %). Single crystals suitable for X-Ray diffraction were obtained by vapour diffusion of Et<sub>2</sub>O (30 mL) into an acetonitrile solution containing the Ir complex (20 mg in 2 mL).

**<sup>1</sup>H NMR (CD<sub>3</sub>CN, 400 MHz) δ (ppm):** 8.70 (d, 2H, <sup>3</sup>J = 8.5 Hz), 8.64 (m, 4H), 8.47 (dd, 2H, <sup>3</sup>J = 8.5 Hz, <sup>4</sup>J = 2.2 Hz), 8.31 (m, 2H), 8.18 (d, 2H, <sup>4</sup>J = 2.1 Hz), 7.90 (td, 2H, <sup>3</sup>J = 7.9 Hz, <sup>4</sup>J = 0.9 Hz), 7.83 (dd, 2H, <sup>3</sup>J = 8.5 Hz, <sup>4</sup>J = 2.2 Hz), 7.80 (m, 2H), 7.45 (dd, 2H, <sup>3</sup>J = 8.0 Hz, <sup>4</sup>J = 4.8 Hz), 7.11 (ddd, 2H, <sup>3</sup>J = 7.4 Hz, <sup>4</sup>J = 5.8 Hz, <sup>4</sup>J = 1.4 Hz), 6.71 (ddd, 2H, <sup>3</sup>J<sub>H-F</sub> = 12.3 Hz, <sup>5</sup>J<sub>H-F</sub> = 9.4 Hz, <sup>4</sup>J = 2.4 Hz), 5.79 (dd, 2H, <sup>2</sup>J<sub>H-F</sub> = 8.6 Hz, <sup>4</sup>J = 2.4 Hz).

**<sup>19</sup>F NMR (CD<sub>3</sub>CN, 282 MHz) δ (ppm):** -73.9 (d, 6F, <sup>1</sup>J<sub>P-F</sub> = 707 Hz, PF<sub>6</sub>), -108.8 (d, 2F, <sup>4</sup>J<sub>F-F</sub> = 10.8 Hz), -110.8 (d, 2F, <sup>4</sup>J<sub>F-F</sub> = 10.8 Hz).

**<sup>13</sup>C NMR (CD<sub>3</sub>CN, 125 MHz) δ (ppm):** 164.6 (d, J<sub>C-F</sub> = 6.9 Hz, C<sub>quat</sub>), 163.3 (dd, <sup>1</sup>J<sub>C-F</sub> = 255 Hz, <sup>3</sup>J<sub>C-F</sub> = 12.5 Hz, C<sub>quat</sub>), 162.2 (dd, <sup>1</sup>J<sub>C-F</sub> = 255 Hz, <sup>3</sup>J<sub>C-F</sub> = 12.5 Hz, C<sub>quat</sub>), 155.3 (C<sub>quat</sub>), 154.7 (d, J<sub>C-F</sub> = 6.6 Hz, C<sub>quat</sub>), 154.6 (C<sub>quat</sub>), 151.5 (CH), 150.9 (CH), 149.7 (CH), 148.9 (CH), 143.9 (C<sub>quat</sub>), 140.4 (CH), 139.1 (CH), 138.8 (CH), 135.5 (CH), 131.6 (C<sub>quat</sub>), 129.0 (dd, J<sub>C-F</sub> = 4.6 Hz, J<sub>C-F</sub> = 2.8 Hz, C<sub>quat</sub>), 126.6 (CH), 124.9 (t, J = 9.9 Hz, CH), 114.8 (dd, J<sub>C-F</sub> = 17.8 Hz, J<sub>C-F</sub> = 3.0 Hz, CH), 99.9 (t, <sup>3</sup>J<sub>C-F</sub> = 27.1 Hz, CH).

**MS (ESI<sup>+</sup>):** calcd for [M-PF<sub>6</sub>]<sup>+</sup> C<sub>42</sub>H<sub>26</sub>F<sub>4</sub>Ir<sub>1</sub>N<sub>6</sub> 883.18, found 883.17.

**UV-Visible (THF):** λ (nm), ε (10<sup>3</sup> L.mol<sup>-1</sup>.cm<sup>-1</sup>) 290 (40.6), 342 (38.7).



## NMR spectra of final complexes

### [Ir(ppy)<sub>2</sub>(L1)][PF<sub>6</sub>]

<sup>1</sup>H NMR (CD<sub>3</sub>CN, 400 MHz)

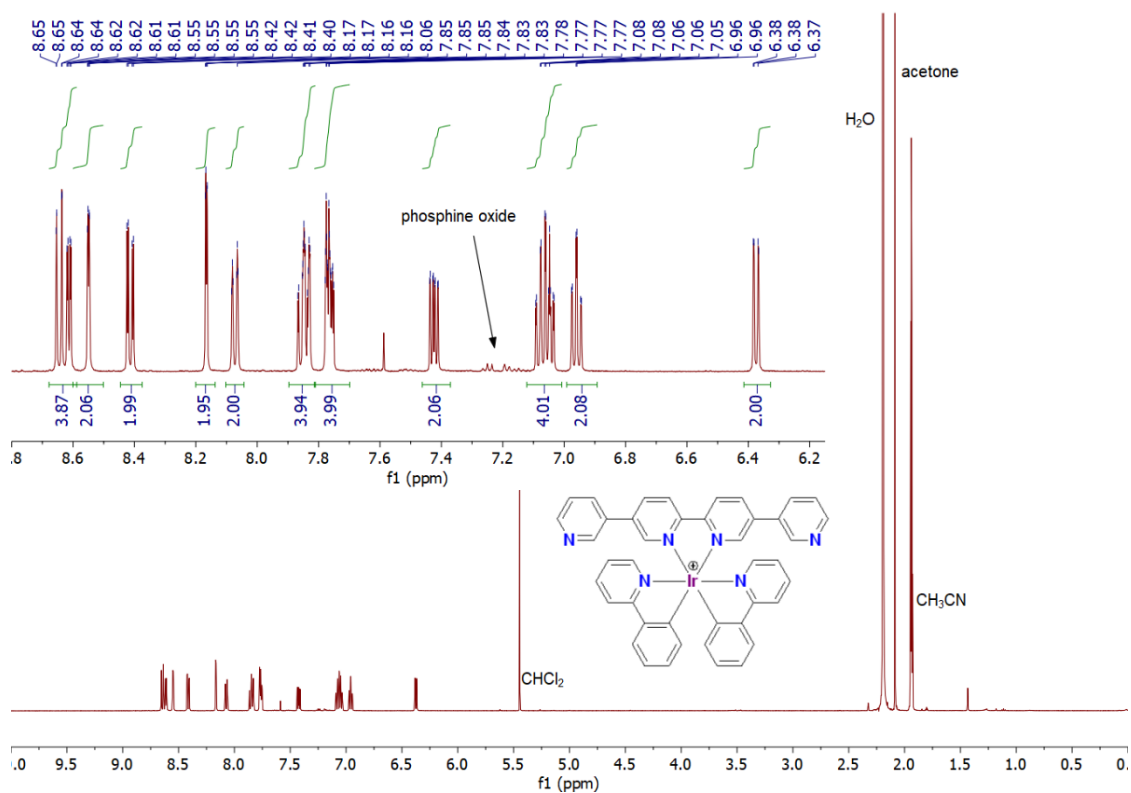

<sup>13</sup>C NMR (CD<sub>3</sub>CN, 100 MHz)

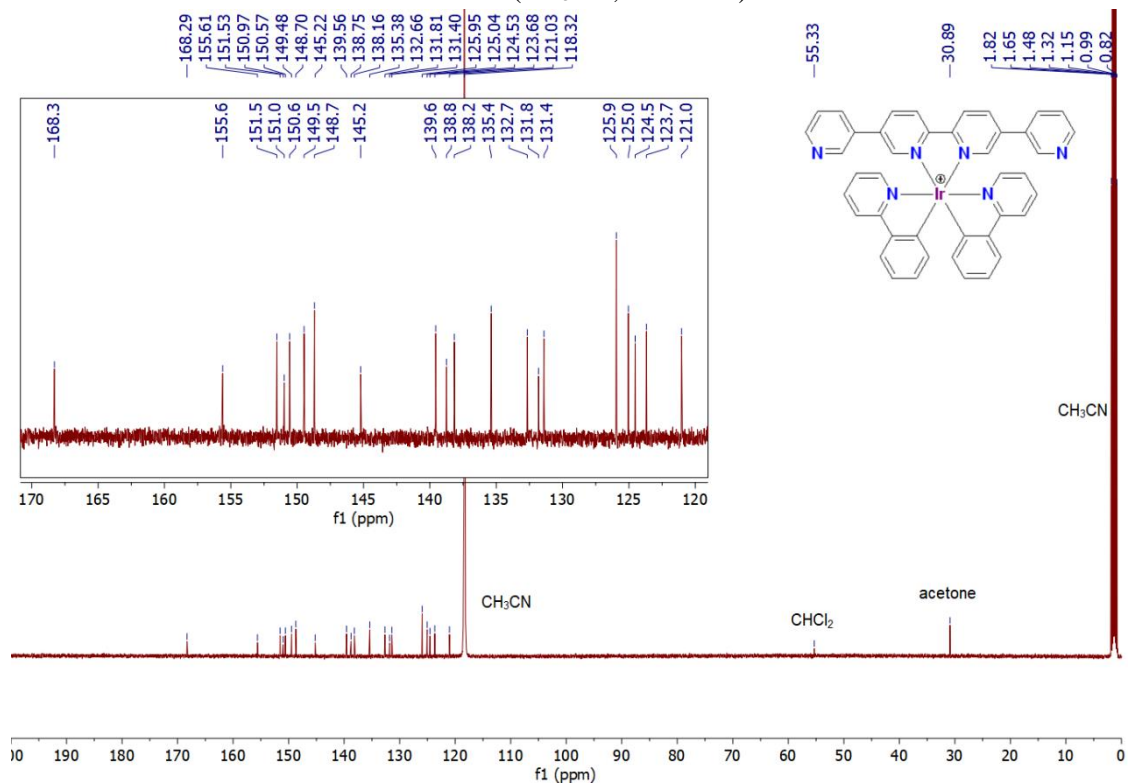

**[Ir(Fppy)<sub>2</sub>(L1)][PF<sub>6</sub>]**

<sup>1</sup>H NMR (CD<sub>3</sub>CN, 400 MHz)

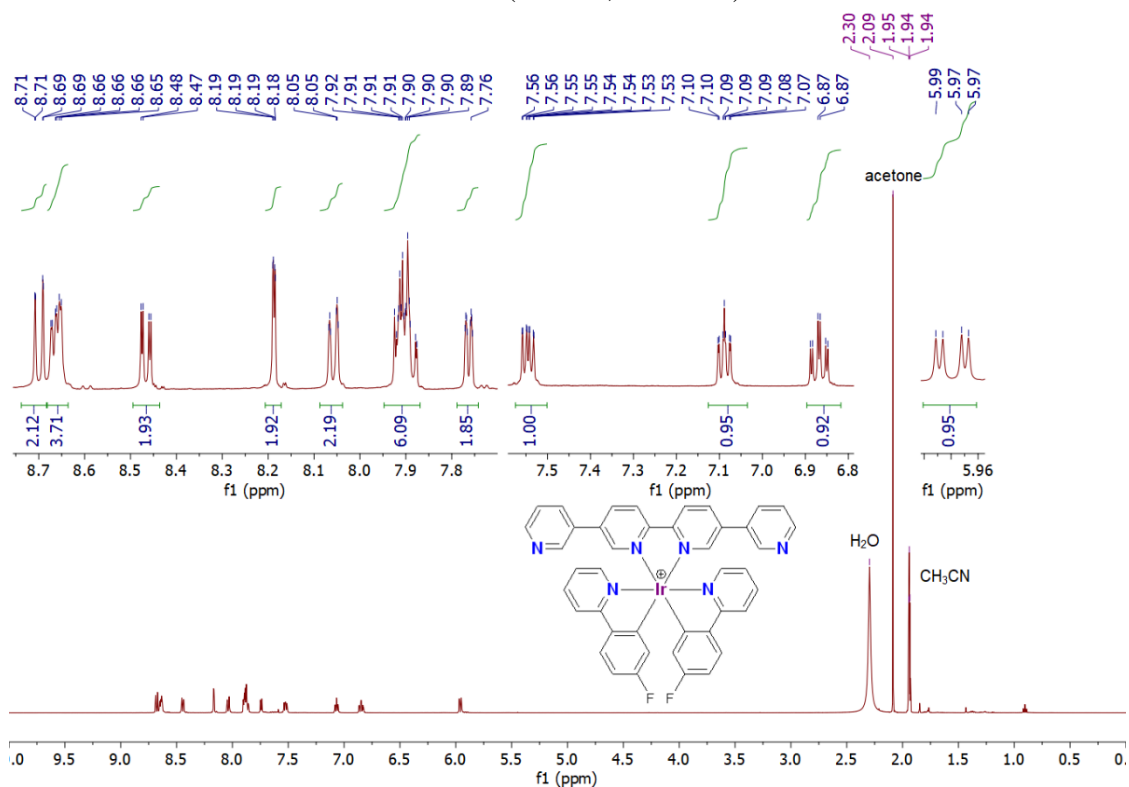

<sup>13</sup>C NMR (CD<sub>3</sub>CN, 100 MHz)

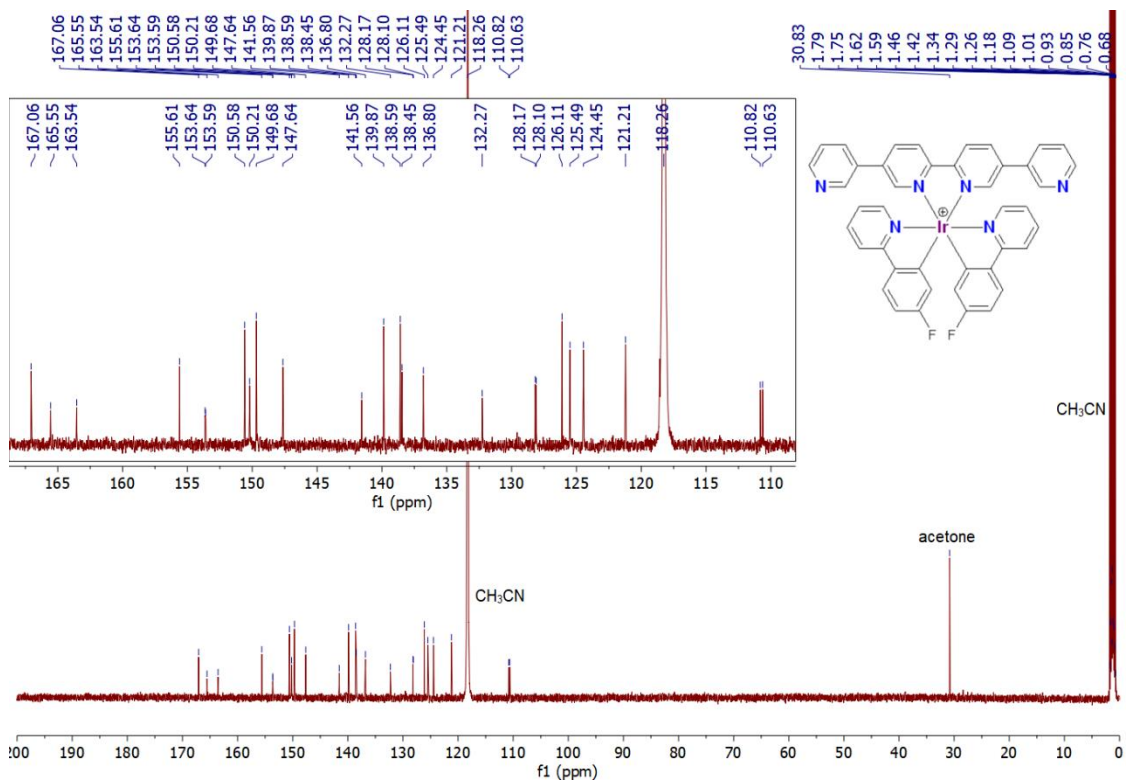

$^{19}\text{F}$  NMR ( $\text{CD}_3\text{CN}$ , 282 MHz)

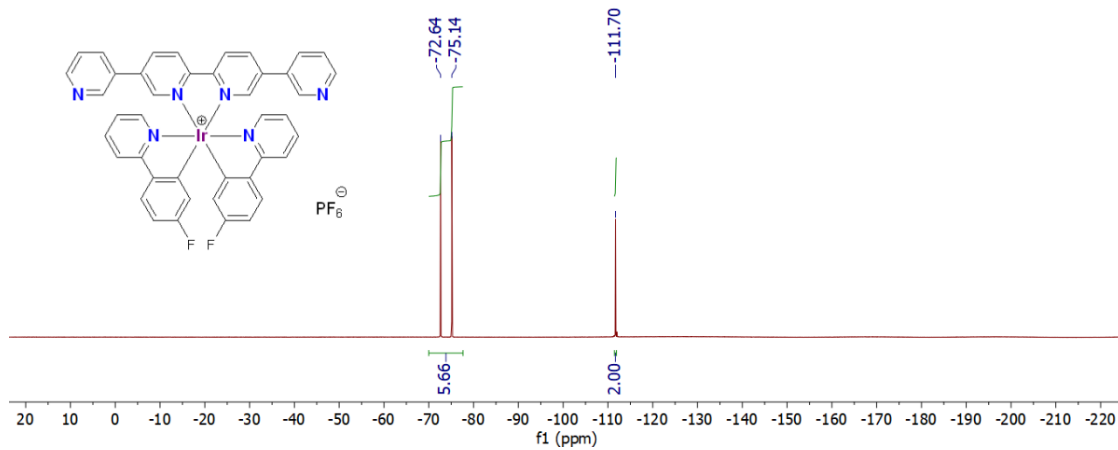

**[Ir(dFppy)<sub>2</sub>(L1)][PF<sub>6</sub>]**

<sup>1</sup>H NMR (CD<sub>3</sub>CN, 400 MHz)

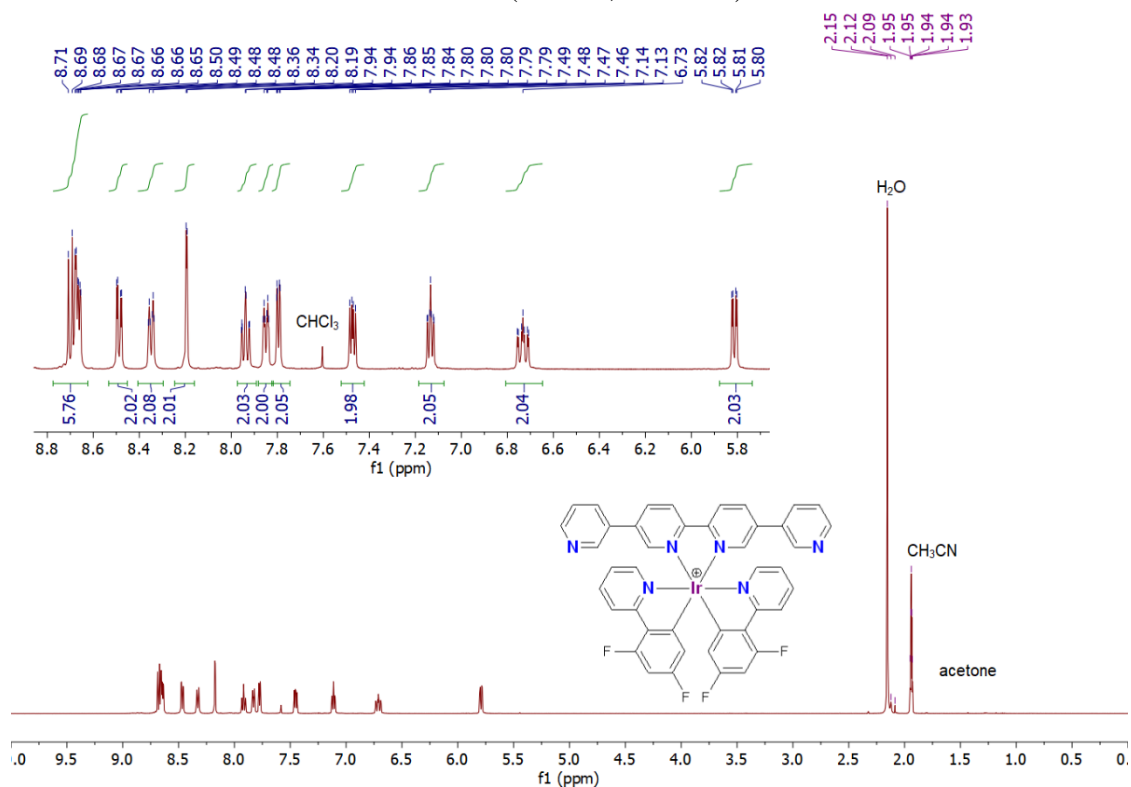

<sup>13</sup>C NMR (CD<sub>3</sub>CN, 125 MHz)

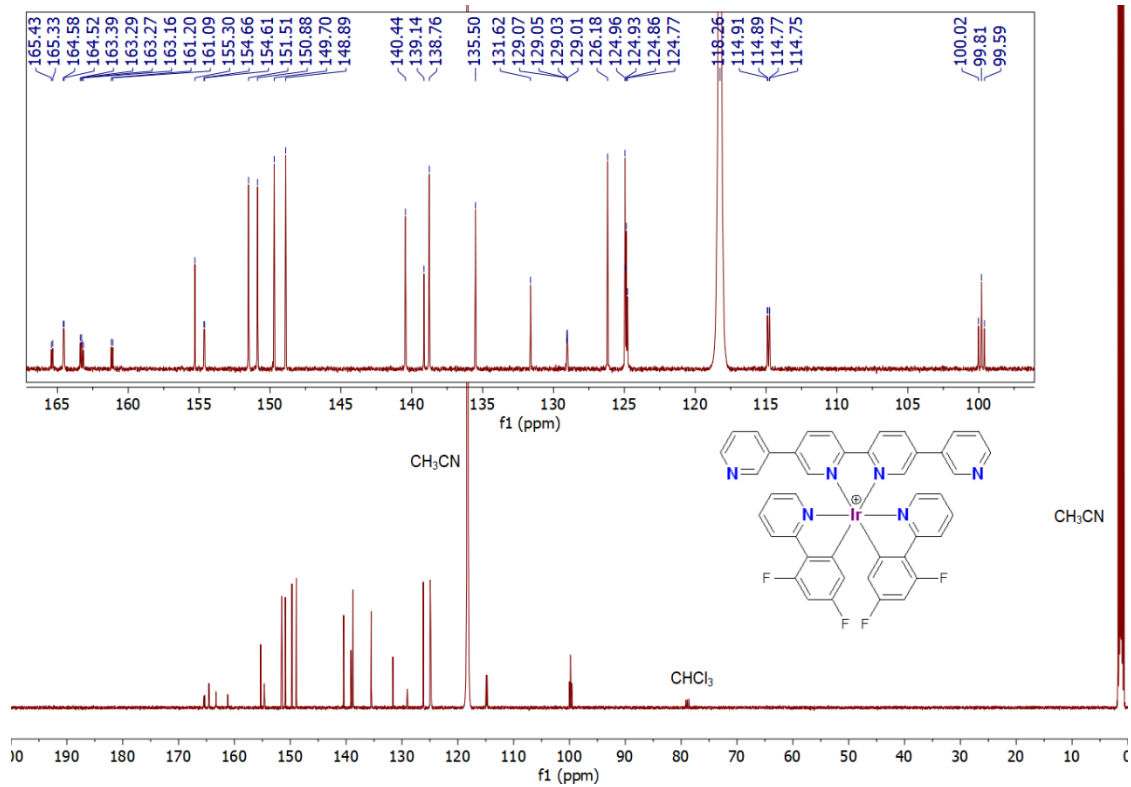

$^{19}\text{F}$  NMR ( $\text{CD}_3\text{CN}$ , 282 MHz)

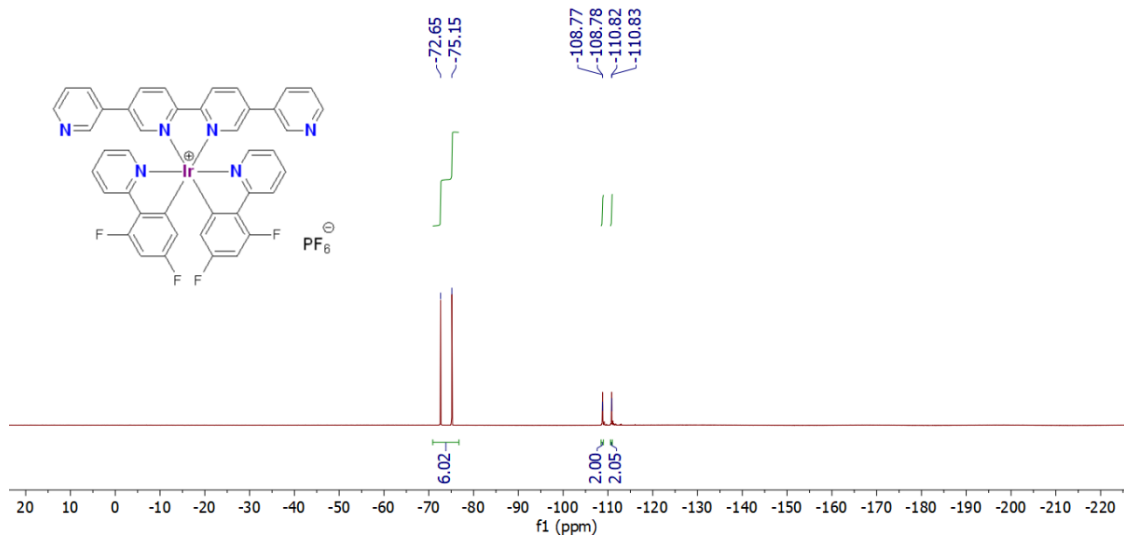

## Crystallographic data

Table S1: Crystallographic data for discrete complexes

|                                                 | 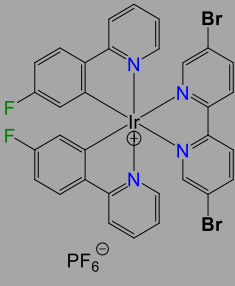<br>[Ir(Fppy) <sub>2</sub> (L2)][PF <sub>6</sub> ] | <br>[Ir(ppy) <sub>2</sub> (L1)][PF <sub>6</sub> ]  | <br>[Ir(Fppy) <sub>2</sub> (L1)][PF <sub>6</sub> ] | <br>[Ir(dFppy) <sub>2</sub> (L1)][PF <sub>6</sub> ] |
|-------------------------------------------------|-------------------------------------------------------------------------------------------------------------------------------------|-------------------------------------------------------------------------------------------------------------------------------------|--------------------------------------------------------------------------------------------------------------------------------------|----------------------------------------------------------------------------------------------------------------------------------------|
| Formula                                         | C <sub>32</sub> H <sub>20</sub> Br <sub>2</sub> F <sub>2</sub> IrN <sub>4</sub> ,<br>PF <sub>6</sub> , CH <sub>3</sub> CN           | C <sub>42</sub> H <sub>30</sub> IrN <sub>6</sub> , PF <sub>6</sub> ,<br>0.7 C <sub>4</sub> H <sub>10</sub> O<br>(+squeezed solvent) | C <sub>42</sub> H <sub>28</sub> F <sub>2</sub> IrN <sub>6</sub> , PF <sub>6</sub>                                                    | 2(C <sub>42</sub> H <sub>26</sub> F <sub>4</sub> IrN <sub>6</sub> ,<br>PF <sub>6</sub> ), C <sub>4</sub> H <sub>10</sub> O             |
| FW (g/mol)                                      | 1036.56                                                                                                                             | 1007.79                                                                                                                             | 991.87                                                                                                                               | 2129.83                                                                                                                                |
| Crystal system                                  | monoclinic                                                                                                                          | triclinic                                                                                                                           | triclinic                                                                                                                            | monoclinic                                                                                                                             |
| Space group                                     | P 2 <sub>1</sub> /c                                                                                                                 | P-1                                                                                                                                 | P-1                                                                                                                                  | P 2 <sub>1</sub> /n                                                                                                                    |
| <i>a</i> , Å                                    | 14.3846(9)                                                                                                                          | 12.3066(3)                                                                                                                          | 10.9258(2)                                                                                                                           | 22.6153(5)                                                                                                                             |
| <i>b</i> , Å                                    | 9.9896(5)                                                                                                                           | 13.8077(3)                                                                                                                          | 12.5975(3)                                                                                                                           | 11.2357(3)                                                                                                                             |
| <i>c</i> , Å                                    | 23.4281(13)                                                                                                                         | 14.7006(4)                                                                                                                          | 15.0044(3)                                                                                                                           | 31.8105(8)                                                                                                                             |
| <i>α</i> , °                                    | 90                                                                                                                                  | 80.0580(10)                                                                                                                         | 66.5620(10)                                                                                                                          | 90                                                                                                                                     |
| <i>β</i> , °                                    | 99.105(3)                                                                                                                           | 67.0200(10)                                                                                                                         | 75.1360(10)                                                                                                                          | 93.9120(10)                                                                                                                            |
| <i>γ</i> , °                                    | 90                                                                                                                                  | 67.3610(10)                                                                                                                         | 82.9900(10)                                                                                                                          | 90                                                                                                                                     |
| <i>V</i> , Å <sup>3</sup>                       | 3324.1(3)                                                                                                                           | 2121.84(9)                                                                                                                          | 1830.91(7)                                                                                                                           | 8064.2(3)                                                                                                                              |
| <i>Z</i>                                        | 4                                                                                                                                   | 2                                                                                                                                   | 2                                                                                                                                    | 4                                                                                                                                      |
| <i>T</i> , K                                    | 173(2)                                                                                                                              | 173(2)                                                                                                                              | 173(2)                                                                                                                               | 173(2)                                                                                                                                 |
| <i>μ</i> , mm <sup>-1</sup>                     | 6.549                                                                                                                               | 3.250                                                                                                                               | 3.773                                                                                                                                | 3.441                                                                                                                                  |
| Refls. coll.                                    | 46738                                                                                                                               | 31800                                                                                                                               | 30087                                                                                                                                | 139161                                                                                                                                 |
| Ind. Refls. ( <i>R</i> <sub>int</sub> )         | 9513<br>(0.0586)                                                                                                                    | 9677<br>(0.0622)                                                                                                                    | 9814<br>(0.0285)                                                                                                                     | 22267<br>(0.0639)                                                                                                                      |
| <i>R</i> <sub>I</sub> (I > 2σ(I)) <sup>a</sup>  | 0.0387                                                                                                                              | 0.0293                                                                                                                              | 0.0280                                                                                                                               | 0.0435                                                                                                                                 |
| <i>wR</i> <sub>2</sub> (I > 2σ(I)) <sup>a</sup> | 0.0769                                                                                                                              | 0.0730                                                                                                                              | 0.0675                                                                                                                               | 0.0897                                                                                                                                 |
| <i>R</i> <sub>I</sub> (all data) <sup>a</sup>   | 0.0677                                                                                                                              | 0.0328                                                                                                                              | 0.0354                                                                                                                               | 0.0681                                                                                                                                 |
| <i>wR</i> <sub>2</sub> (all data) <sup>a</sup>  | 0.0863                                                                                                                              | 0.0749                                                                                                                              | 0.0705                                                                                                                               | 0.0991                                                                                                                                 |
| <i>GOF</i>                                      | 1.022                                                                                                                               | 1.045                                                                                                                               | 1.006                                                                                                                                | 1.054                                                                                                                                  |

$$^a R_1 = \sum ||F_0| - |F_c|| / \sum |F_0|; wR_2 = [\sum w(F_0^2 - F_c^2)^2 / \sum wF_0^4]^{1/2}$$

**Table S2: Selected bond lengths and angles for [Ir(Fppy)<sub>2</sub>(L2)][PF<sub>6</sub>] $\cdot$ CH<sub>3</sub>CN**

| [Ir(Fppy) <sub>2</sub> (L2)][PF <sub>6</sub> ] $\cdot$ CH <sub>3</sub> CN |            |
|---------------------------------------------------------------------------|------------|
| <b>Bond lengths</b>                                                       |            |
| Ir-N <sub>L2</sub> (Å)                                                    | 2.138(4)   |
|                                                                           | 2.152(3)   |
| Ir-N <sub>ppy</sub> (Å)                                                   | 2.045(4)   |
|                                                                           | 2.046(4)   |
| Ir-C <sub>ppy</sub> (Å)                                                   | 2.016(4)   |
|                                                                           | 2.018(4)   |
| <b>Angles</b>                                                             |            |
| N <sub>L2</sub> -Ir-N <sub>L2</sub> (°)                                   | 76.53(13)  |
| N <sub>ppy</sub> -Ir-N <sub>ppy</sub> (°)                                 | 172.07(14) |
| N <sub>ppy</sub> -Ir-C <sub>ppy</sub> (°)                                 | 80.30(17)  |
|                                                                           | 80.21(17)  |
| <b>Dihedral angles</b>                                                    |            |
| bpy<br>N-C-C-N (°)                                                        | 3.77       |
| Xppy<br>N-C-C-C (°)                                                       | -1.91      |
|                                                                           | -0.64      |

**Table S3 : Selected bond lengths and angles for [Ir(Xppy)<sub>2</sub>(L1)][PF<sub>6</sub>]**

|                                               | [Ir(ppy) <sub>2</sub> (L1)][PF <sub>6</sub> ]<br>0.7C <sub>4</sub> H <sub>10</sub> O<br>(squeezed) | [Ir(Fppy) <sub>2</sub> (L1)][PF <sub>6</sub> ] | [Ir(dFppy) <sub>2</sub> (L1)][PF <sub>6</sub> ]<br>·0.5C <sub>4</sub> H <sub>10</sub> O |            |
|-----------------------------------------------|----------------------------------------------------------------------------------------------------|------------------------------------------------|-----------------------------------------------------------------------------------------|------------|
| <b>Bond lengths</b>                           |                                                                                                    |                                                |                                                                                         |            |
| Ir-N <sub>L1</sub> (Å)                        | 2.125(2)                                                                                           | 2.131(2)                                       | 2.133(3)                                                                                | 2.129(4)   |
|                                               | 2.131(3)                                                                                           | 2.144(2)                                       | 2.152(3)                                                                                | 2.147(3)   |
| Ir-N <sub>Xppy</sub> (Å)                      | 2.042(3)                                                                                           | 2.052(3)                                       | 2.043(4)                                                                                | 2.037(3)   |
|                                               | 2.058(3)                                                                                           | 2.055(3)                                       | 2.044(4)                                                                                | 2.040(3)   |
| Ir-C <sub>Xppy</sub> (Å)                      | 2.003(3)                                                                                           | 2.007(3)                                       | 2.009(4)                                                                                | 2.006(4)   |
|                                               | 2.013(3)                                                                                           | 2.008(3)                                       | 2.010(4)                                                                                | 2.005(4)   |
| <b>Angles</b>                                 |                                                                                                    |                                                |                                                                                         |            |
| N <sub>L1</sub> -Ir-N <sub>L1</sub> (°)       | 76.30(9)                                                                                           | 77.02(9)                                       | 76.46(13)                                                                               | 76.82(14)  |
| N <sub>Xppy</sub> -Ir-N <sub>Xppy</sub> (°)   | 173.15(10)                                                                                         | 172.06(9)                                      | 171.39(13)                                                                              | 171.82(14) |
| N <sub>Xppy</sub> -Ir-C <sub>Xppy</sub> (°)   | 80.27(12)                                                                                          | 80.11(11)                                      | 80.32(16)                                                                               | 80.70(17)  |
|                                               | 80.51(12)                                                                                          | 80.45(11)                                      | 80.92(18)                                                                               | 80.52(15)  |
| <b>Dihedral angles</b>                        |                                                                                                    |                                                |                                                                                         |            |
| <b>L1</b><br>N-C-C-N (°)                      | -0.79                                                                                              | -2.72                                          | 8.91                                                                                    | 6.99       |
|                                               | Xppy                                                                                               | -0.14                                          | -1.19                                                                                   | -5.75      |
| N-C-C-C (°)                                   | -3.56                                                                                              | -1.95                                          | -10.49                                                                                  | -10.27     |
| <b>Miscellaneous</b>                          |                                                                                                    |                                                |                                                                                         |            |
| 3py-bpy angle<br>(°) <sup>a</sup>             | 17.78                                                                                              | 19.14                                          | 2.60                                                                                    | 24.24      |
|                                               | 21.65                                                                                              | 28.34                                          | 21.56 / 31.39*                                                                          | 24.88      |
| Curvature angle<br><b>L1</b> (°) <sup>b</sup> | 166.01                                                                                             | 174.45                                         | 169.77 /<br>174.76*                                                                     | 174.20     |

a) “3py-bpy angle” corresponds to the angle between plane A and plane B as defined in Scheme S1a; b) The “curvature angle **L1**” is defined as highlighted in Scheme S1b; \*One of the 3-pyridyl units is disordered over two positions.

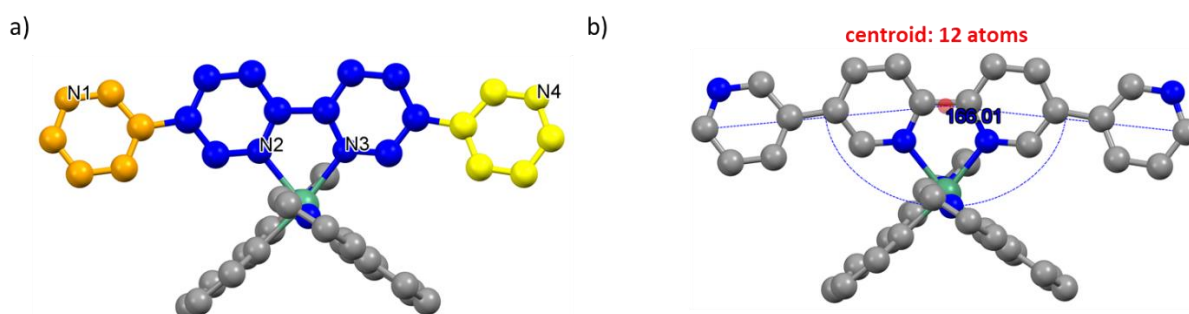

**Scheme S1:** a) Portion of the X-ray structure of [Ir(ppy)<sub>2</sub>(L1)][PF<sub>6</sub>]  
·C<sub>4</sub>H<sub>10</sub>O (squeezed) highlighting the different atoms considered to define plane A and plane B used to measure “3py-bpy angle”. Plane A is the mean plane obtained with the six atoms of the 3-pyridyl units coloured either in yellow or orange while plane B is the mean plane considering the twelve atoms of the bipyridyl unit coloured in blue; b) Portion of the X-ray structure of [Ir(ppy)<sub>2</sub>(L1)][PF<sub>6</sub>]  
·C<sub>4</sub>H<sub>10</sub>O (squeezed) showing the “curvature angle **L1**” defined by the angle between the two carbon atoms in para position with respect to the bpy unit and the centroid of the central bipyridine moiety.



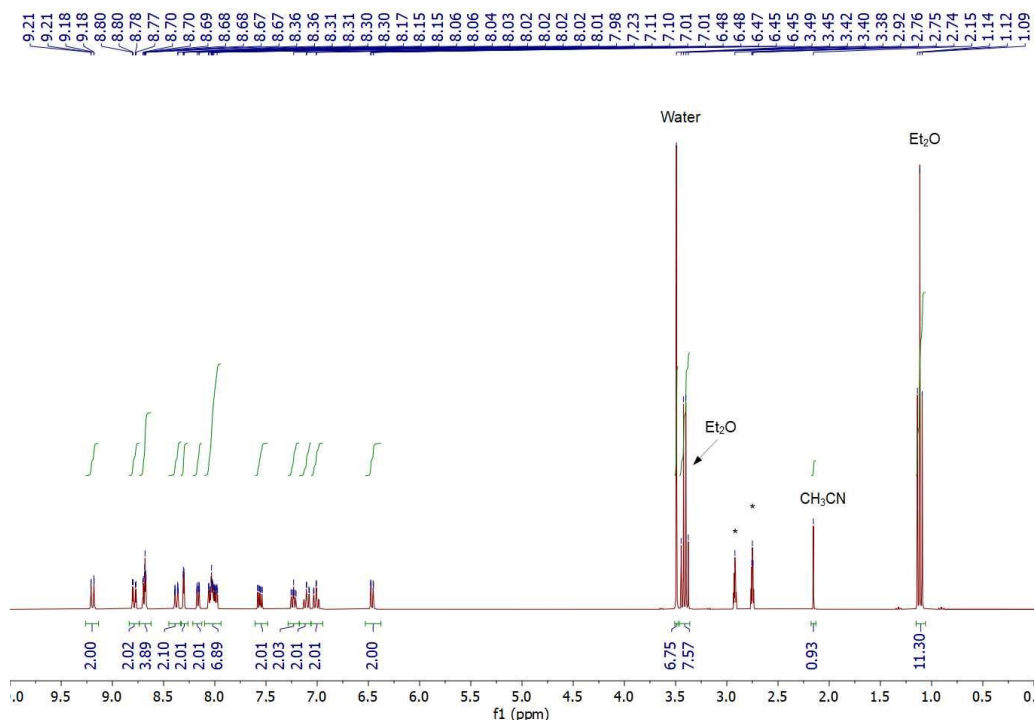

**Fig. S1:**  $^1\text{H}$  NMR spectrum (dmf- $d_7$ , 300MHz) of single crystals of  $[\text{Ir}(\text{ppy})_2(\mathbf{L1})][\text{PF}_6]\cdot\text{C}_4\text{H}_{10}\text{O}$  (squeezed) dissolved in dmf- $d_7$  highlighting the presence of  $\text{Et}_2\text{O}$  ( $\delta = 1.12$  (t) and 3.41 (q) ppm) and  $\text{CH}_3\text{CN}$  ( $\delta = 2.15$  ppm, singlet) within the crystal. Water and dmf signals are also present. Those crystals were used to solve the crystal structure by X-Ray diffraction. Integration of signals shows the presence of one  $\text{CH}_3\text{CN}$  molecule and almost two  $\text{Et}_2\text{O}$  molecules per one Ir complex molecule. Because  $\text{Et}_2\text{O}$  was used as solvent to wash the red crystals, integration of its signal is most probably overestimated. The X-Ray study revealed the presence of residual densities corresponding to 34 electrons that could not be assigned with certainty, and it was thus squeezed. According to the NMR spectrum above, this density might be attributed to  $\text{CH}_3\text{CN}$  molecules.

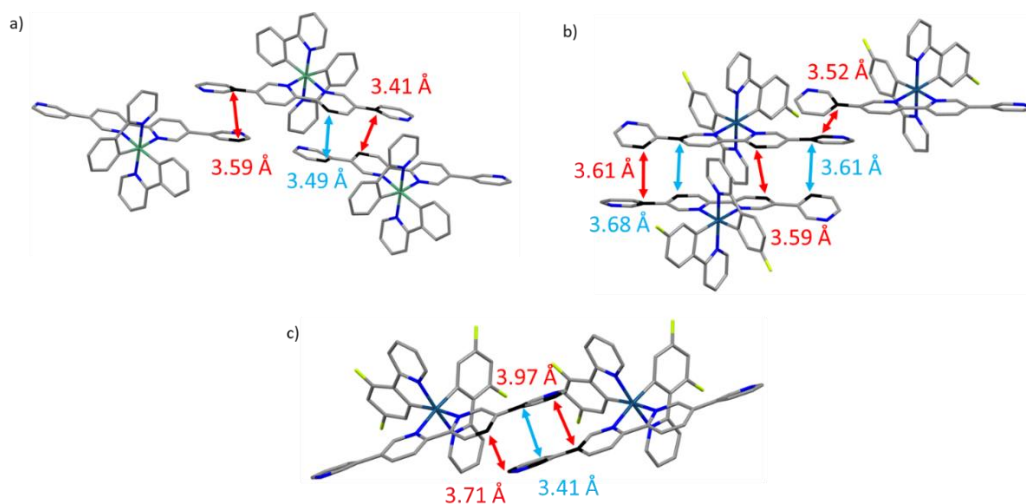

**Fig. S2:** Portions of the X-ray structure of  $[\text{Ir}(\text{ppy})_2(\mathbf{L1})][\text{PF}_6]\cdot\text{C}_4\text{H}_{10}\text{O}$  (squeezed) (a),  $[\text{Ir}(\text{Fppy})_2(\mathbf{L1})][\text{PF}_6]$  (b) and  $[\text{Ir}(\text{dFppy})_2(\mathbf{L1})][\text{PF}_6]\cdot\text{C}_4\text{H}_{10}\text{O}$  (c) showing  $\pi$ - $\pi$  interactions between two complexes in the crystal packing. The distances reported correspond to C-C distances, with the C atoms considered depicted in black. H atoms,  $\text{PF}_6$  anions and solvent molecules have been omitted for clarity.

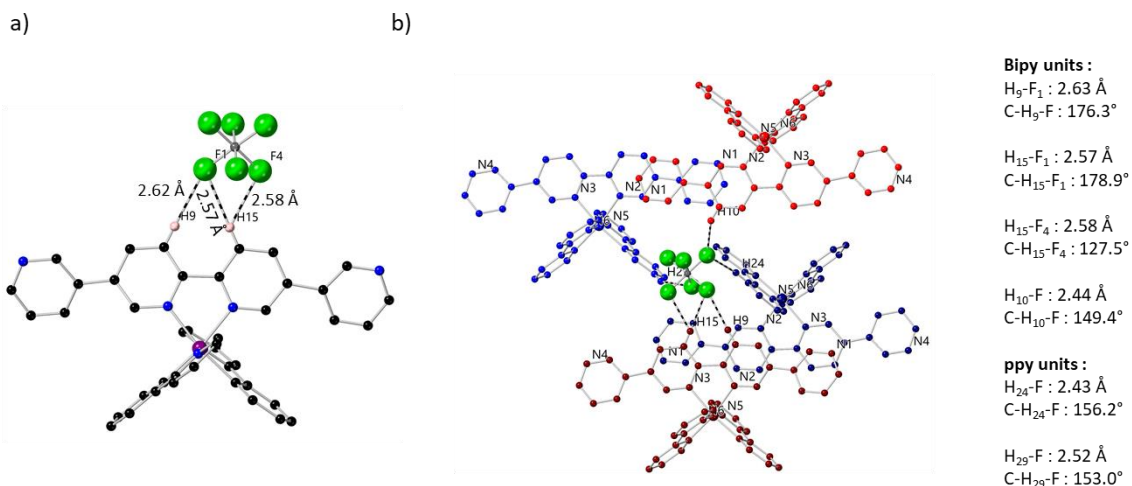

**Fig. S3:** Portions of the X-ray structure of  $[Ir(ppy)_2(L1)][PF_6] \cdot C_4H_{10}O$  (squeezed) showing non classical hydrogen bonds of the  $PF_6$  anion and five distinct Ir complexes in the crystal packing. The distances reported correspond to H-F distances. Only the H atoms involved in H-bonding are represented. Other H atoms and  $PF_6$  anions have been omitted for clarity. Electron density related to some solvent molecules was removed using the SQUEEZE command because of a severe disorder.  $Et_2O$  solvent molecules are not represented in the figure.

A rather short H-F distance is observed between two H atoms belonging to one bpy moiety, acting as a chelating unit, and two fluorine atoms belonging to one  $PF_6$  anion (H-F distance of 2.58 to 2.63 Å, C-H-F angles *ca.* 177° and 127.5°, Fig. S3a). This Ir complex is depicted in dark red on Fig. S3b. Such interactions have been reported before.<sup>9</sup> It should be noted that, contrary to what was observed for similar cationic Ir complexes having Cl as counterion,<sup>10,11</sup> only one bipyridine unit is involved as a chelating moiety. The other bipyridine unit belonging to a second Ir complex (depicted in red, Fig. S3b) display only one  $F \cdots HC$  interaction between one H atom located on position 4 of the bpy unit and another F atom of the anion (H-F distance of 2.44 Å, C-H-F angles 149.4°).

Finally, the same  $PF_6$  anion exhibits close contacts with H atoms located on the phenyl units (light blue) and on the pyridyl moieties (dark blue and blue) of two distinct ppy moieties belonging to two other Ir complexes ( $H_{Ph}-F$  distance of 2.43 Å and  $H_{Py}-F$  distances of 2.52 Å, C-H-F angles 156.2° and 153.0° respectively) (Fig. S3b).

A short H-F distance is also observed between one F atom of the  $PF_6$  anion and one  $Et_2O$  molecule (H-F distance of 2.54 Å, C-H-F angle 146.96°) (not represented on FigS3b for clarity).

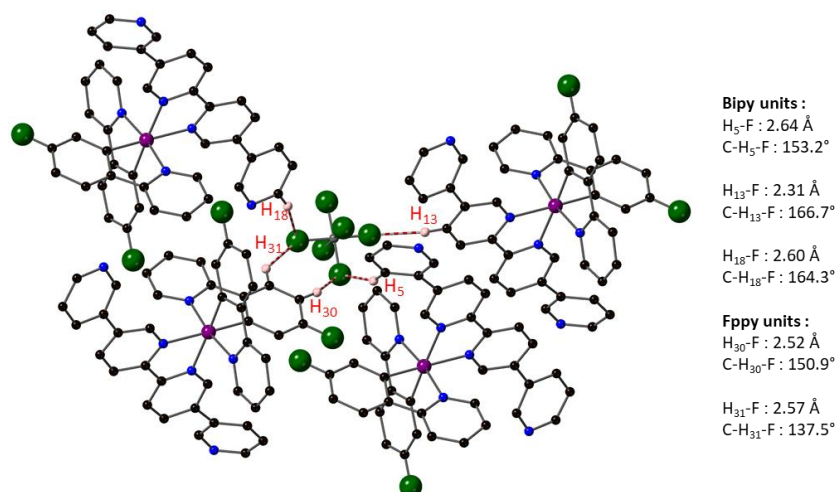

**Fig. S4:** Portions of the X-ray structure of  $[\text{Ir}(\text{Fppy})_2(\text{L1})][\text{PF}_6]$  showing non-classical hydrogen bonds of the  $\text{PF}_6$  anion and four distinct Ir complexes in the crystal packing. The distances reported correspond to H-F distances. Only the H atoms involved in H-bonding are represented. Other H atoms and  $\text{PF}_6$  anions have been omitted for clarity.

A rather short distance of 2.31 Å is observed between one F atom of the anion and one H atom located on position 4 of the bpy moiety (C-H-F angle of 166.7°). The two H atoms of the phenyl unit belonging to one Fppy ligand exhibit H-F distances of 2.52 and 2.57 Å (C-H-C angles of 150.9 and 137.5° respectively). The third and fourth Ir complexes involved in the H-bond pattern are connected to the  $\text{PF}_6$  anion through one H atom located either in position 4 or 6 of the 3-pyridyl terminal group belonging to **L1** with longer H-F distances of 2.60 and 2.64 Å respectively (C-H-C angles of 164.3 and 153.2° respectively).

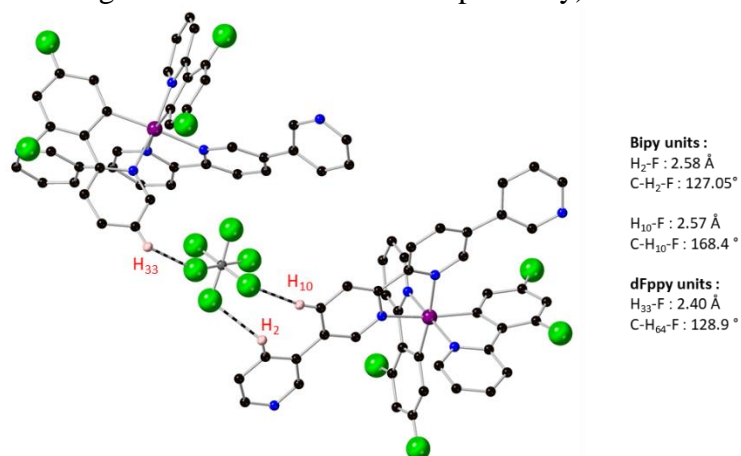

**Fig. S5:** Portions of the X-ray structure of  $[\text{Ir}(\text{dFppy})_2(\text{L1})][\text{PF}_6] \cdot \text{C}_4\text{H}_{10}\text{O}$  showing non-classical hydrogen bonds of the  $\text{PF}_6$  anion and two distinct Ir complexes in the crystal packing. The distances reported correspond to H-F distances. Only the H atoms involved in H-bonding are represented. Other H atoms,  $\text{PF}_6$  anions and  $\text{Et}_2\text{O}$  molecules have been omitted for clarity. Disorder on one of the peripheral 3-pyridyl units has not been represented for clarity.

Two of the H-F interactions involve two F atoms of one  $\text{PF}_6$  ion and one H atom located on position 4 of the bpy backbone (H-F distance 2.57 Å, C-H-F angle 168.4°) and one H atom located on position 2 of the 3-pyridyl terminal group of the same bpy ligand (H-F distance 2.58 Å, C-H-F angle 127.0°). The third interaction involves a second Ir complex for which one H atom located on position 5 of the pyridyl unit belonging to a dFppy ligand display short contact with a third F atom of the  $\text{PF}_6$  anion (H-F distance 2.40 Å, C-H-F angle 128.9°).

**Table S4 : Crystallographic data for coordination polymers**

|                                                                           | <b>CP1<sub>Br</sub></b>                                                                                                                        | <b>CP2<sub>Cl</sub></b>                                                                                                                            | <b>CP2<sub>Br</sub></b>                                                                                                                                         | <b>CP2<sub>I</sub></b>                                                                                                                          | <b>CP3<sub>Cl</sub></b>                                                                                                       | <b>CP3<sub>Br</sub></b>                                                                                                       | <b>CP3<sub>I</sub><sup>a</sup></b>                                                                                                                         |
|---------------------------------------------------------------------------|------------------------------------------------------------------------------------------------------------------------------------------------|----------------------------------------------------------------------------------------------------------------------------------------------------|-----------------------------------------------------------------------------------------------------------------------------------------------------------------|-------------------------------------------------------------------------------------------------------------------------------------------------|-------------------------------------------------------------------------------------------------------------------------------|-------------------------------------------------------------------------------------------------------------------------------|------------------------------------------------------------------------------------------------------------------------------------------------------------|
| Metallatecton                                                             | [Ir(ppy) <sub>2</sub> (L1)] <sup>+</sup>                                                                                                       | [Ir(Fppy) <sub>2</sub> (L1)] <sup>+</sup>                                                                                                          |                                                                                                                                                                 |                                                                                                                                                 | [Ir(dFppy) <sub>2</sub> (L1)] <sup>+</sup>                                                                                    |                                                                                                                               |                                                                                                                                                            |
| Metallic salt                                                             | CdBr <sub>2</sub>                                                                                                                              | CdCl <sub>2</sub>                                                                                                                                  | CdBr <sub>2</sub>                                                                                                                                               | CdI <sub>2</sub>                                                                                                                                | CdCl <sub>2</sub>                                                                                                             | CdBr <sub>2</sub>                                                                                                             | CdI <sub>2</sub>                                                                                                                                           |
| Formula                                                                   | C <sub>84</sub> H <sub>60</sub> Br <sub>7.28</sub> Cd <sub>3</sub> Cl <sub>0.72</sub><br>Ir <sub>2</sub> N <sub>12</sub> , 2 CHCl <sub>3</sub> | C <sub>84</sub> H <sub>56</sub> Cd <sub>3</sub> Cl <sub>8</sub> F <sub>4</sub> Ir <sub>2</sub> N <sub>12</sub> ,<br>1.7CHCl <sub>3</sub> + solvent | C <sub>84</sub> H <sub>56</sub> Br <sub>6.78</sub> Cd <sub>3</sub> Cl <sub>1.22</sub><br>F <sub>4</sub> Ir <sub>2</sub> N <sub>12</sub> , 1.7 CHCl <sub>3</sub> | C <sub>42</sub> H <sub>28</sub> Cd <sub>1.46</sub> Cl <sub>1.94</sub> F <sub>2</sub> I <sub>2.45</sub> Ir<br>N <sub>6</sub> , CHCl <sub>3</sub> | C <sub>84</sub> H <sub>52</sub> Cd <sub>3</sub> Cl <sub>8</sub> F <sub>8</sub> Ir <sub>2</sub> N <sub>12</sub> ,<br>+ solvent | C <sub>84</sub> H <sub>52</sub> Br <sub>8</sub> Cd <sub>3</sub> F <sub>8</sub> Ir <sub>2</sub> N <sub>12</sub> ,<br>+ solvent | C <sub>84</sub> H <sub>52</sub> Cd <sub>3</sub> Cl <sub>2</sub> F <sub>8</sub> I <sub>6</sub> Ir <sub>2</sub> N <sub>12</sub> ,<br>1.202 CHCl <sub>3</sub> |
| FW(g/mol)                                                                 | 2805.04                                                                                                                                        | 2517.53                                                                                                                                            | 2818.97                                                                                                                                                         | 1510.05                                                                                                                                         | 2386.57                                                                                                                       | 2742.25                                                                                                                       | 3078.82                                                                                                                                                    |
| Crystal system                                                            | Triclinic                                                                                                                                      | Triclinic                                                                                                                                          | Triclinic                                                                                                                                                       | Triclinic                                                                                                                                       | Triclinic                                                                                                                     | Triclinic                                                                                                                     | Triclinic                                                                                                                                                  |
| Space group                                                               | P -1                                                                                                                                           | P-1                                                                                                                                                | P-1                                                                                                                                                             | P-1                                                                                                                                             | P -1                                                                                                                          | P -1                                                                                                                          | P -1                                                                                                                                                       |
| <i>a</i> , Å                                                              | 9.6808(5)                                                                                                                                      | 9.5750(3)                                                                                                                                          | 9.6452(6)                                                                                                                                                       | 9.7057(2)                                                                                                                                       | 9.6716(3)                                                                                                                     | 9.7282(3)                                                                                                                     | 9.7207(3)                                                                                                                                                  |
| <i>b</i> , Å                                                              | 14.3456(7)                                                                                                                                     | 14.2134(4)                                                                                                                                         | 14.3456(8)                                                                                                                                                      | 14.5895(4)                                                                                                                                      | 13.8319(4)                                                                                                                    | 14.2740(5)                                                                                                                    | 14.6181(5)                                                                                                                                                 |
| <i>c</i> , Å                                                              | 17.4662(8)                                                                                                                                     | 17.6636(5)                                                                                                                                         | 17.6310(11)                                                                                                                                                     | 17.6961(4)                                                                                                                                      | 17.6708(5)                                                                                                                    | 17.6802(6)                                                                                                                    | 17.6742(6)                                                                                                                                                 |
| $\alpha$ , °                                                              | 92.283(2)                                                                                                                                      | 91.8870(10)                                                                                                                                        | 91.978(2)                                                                                                                                                       | 91.3200(10)                                                                                                                                     | 92.935(2)                                                                                                                     | 92.379(2)                                                                                                                     | 91.285(2)                                                                                                                                                  |
| $\beta$ , °                                                               | 105.186(2)                                                                                                                                     | 105.5820(10)                                                                                                                                       | 105.268(2)                                                                                                                                                      | 105.8290(10)                                                                                                                                    | 102.647(2)                                                                                                                    | 103.849(2)                                                                                                                    | 105.818(2)                                                                                                                                                 |
| $\gamma$ , °                                                              | 106.412(2)                                                                                                                                     | 106.2460(10)                                                                                                                                       | 106.498(2)                                                                                                                                                      | 106.9280(10)                                                                                                                                    | 106.392(2)                                                                                                                    | 106.806(2)                                                                                                                    | 106.908(2)                                                                                                                                                 |
| <i>V</i> , Å <sup>3</sup>                                                 | 2228.52(19)                                                                                                                                    | 2207.85(11)                                                                                                                                        | 2240.7(2)                                                                                                                                                       | 2291.98(10)                                                                                                                                     | 2196.65(12)                                                                                                                   | 2265.65(13)                                                                                                                   | 2297.76(14)                                                                                                                                                |
| <i>Z</i>                                                                  | 1                                                                                                                                              | 1                                                                                                                                                  | 1                                                                                                                                                               | 2                                                                                                                                               | 1                                                                                                                             | 1                                                                                                                             | 1                                                                                                                                                          |
| <i>T</i> , K                                                              | 173(2)                                                                                                                                         | 173(2)                                                                                                                                             | 173(2)                                                                                                                                                          | 173(2)                                                                                                                                          | 173(2)                                                                                                                        | 173(2)                                                                                                                        | 173(2)                                                                                                                                                     |
| $\mu$ , mm <sup>-1</sup>                                                  | 7.430                                                                                                                                          | 4.171                                                                                                                                              | 6.930                                                                                                                                                           | 5.557                                                                                                                                           | 4.043                                                                                                                         | 7.211                                                                                                                         | 5.815                                                                                                                                                      |
| Refls. coll.                                                              | 32847                                                                                                                                          | 98748                                                                                                                                              | 19494                                                                                                                                                           | 17100                                                                                                                                           | 88882                                                                                                                         | 100525                                                                                                                        | 29673                                                                                                                                                      |
| Ind. Refls. ( <i>R</i> <sub>int</sub> )                                   | 10746 (0.0496)                                                                                                                                 | 11895 (0.0306)                                                                                                                                     | 9652 (0.0326)                                                                                                                                                   | 8629 (0.0293)                                                                                                                                   | 11743 (0.0369)                                                                                                                | 12468 (0.0429)                                                                                                                | 11765 (0.0446)                                                                                                                                             |
| <i>R</i> <sub>I</sub> ( <i>I</i> > 2 $\sigma$ ( <i>I</i> )) <sup>a</sup>  | 0.0416                                                                                                                                         | 0.0356                                                                                                                                             | 0.0397                                                                                                                                                          | 0.0367                                                                                                                                          | 0.0397                                                                                                                        | 0.0369                                                                                                                        | 0.0631                                                                                                                                                     |
| <i>wR</i> <sub>2</sub> ( <i>I</i> > 2 $\sigma$ ( <i>I</i> )) <sup>a</sup> | 0.1013                                                                                                                                         | 0.0900                                                                                                                                             | 0.0947                                                                                                                                                          | 0.0868                                                                                                                                          | 0.0975                                                                                                                        | 0.0838                                                                                                                        | 0.1818                                                                                                                                                     |
| <i>R</i> <sub>I</sub> (all data) <sup>a</sup>                             | 0.0600                                                                                                                                         | 0.0442                                                                                                                                             | 0.0544                                                                                                                                                          | 0.0483                                                                                                                                          | 0.0582                                                                                                                        | 0.0587                                                                                                                        | 0.0838                                                                                                                                                     |
| <i>wR</i> <sub>2</sub> (all data) <sup>a</sup>                            | 0.1093                                                                                                                                         | 0.0956                                                                                                                                             | 0.1022                                                                                                                                                          | 0.0933                                                                                                                                          | 0.1095                                                                                                                        | 0.0918                                                                                                                        | 0.1997                                                                                                                                                     |
| <i>GOF</i>                                                                | 1.042                                                                                                                                          | 1.028                                                                                                                                              | 1.032                                                                                                                                                           | 1.019                                                                                                                                           | 1.035                                                                                                                         | 1.022                                                                                                                         | 1.005                                                                                                                                                      |

<sup>a</sup>Because of the poor quality of crystal data for **CP3<sub>I</sub>**, the cif file was not deposited in the CCDC. The data reported here are the result of a preliminary refinement of the crystal data which shows the formation of the Cd<sub>3</sub>X<sub>8</sub> node similar to the crystal structure of **CP2<sub>I</sub>** as depicted in the figures provided below

**Table S5 : Selected bond lengths and angles for the coordination polymers**

|                                                      | CP1 <sub>Br</sub>                                                   | CP2 <sub>Cl</sub>                               | CP2 <sub>Br</sub>                                     | CP2 <sub>I</sub>                                                    | CP3 <sub>Cl</sub>                                   | CP3 <sub>Br</sub>                                 | CP3 <sub>I</sub>                                                  |
|------------------------------------------------------|---------------------------------------------------------------------|-------------------------------------------------|-------------------------------------------------------|---------------------------------------------------------------------|-----------------------------------------------------|---------------------------------------------------|-------------------------------------------------------------------|
| Metallatecton                                        | [Ir(ppy) <sub>2</sub> (L1)] <sup>+</sup>                            | [Ir(Fppy) <sub>2</sub> (L1)] <sup>+</sup>       |                                                       |                                                                     | [Ir(dFppy) <sub>2</sub> (L1)] <sup>+</sup>          |                                                   |                                                                   |
| CdX <sub>2</sub>                                     | CdBr <sub>2</sub> <sup>g</sup>                                      | CdCl <sub>2</sub>                               | CdBr <sub>2</sub>                                     | CdI <sub>2</sub> <sup>g</sup>                                       | CdCl <sub>2</sub>                                   | CdBr <sub>2</sub>                                 | CdI <sub>2</sub>                                                  |
| Bond lengths (Å)                                     |                                                                     |                                                 |                                                       |                                                                     |                                                     |                                                   |                                                                   |
| Ir-N <sub>Xppy</sub> <sup>a</sup>                    | 2.038                                                               | 2.040                                           | 2.036                                                 | 2.053                                                               | 2.036                                               | 2.046                                             | 2.032                                                             |
| Ir-C <sub>Xppy</sub> <sup>a</sup>                    | 2.032                                                               | 2.032                                           | 2.028                                                 | 2.022                                                               | 2.000                                               | 2.011                                             | 2.010                                                             |
| Ir-N <sub>L1</sub>                                   | 2.128(4); 2.138(4)                                                  | 2.132(3); 2.115(3)                              | 2.132(5); 2.111(5)                                    | 2.125(5); 2.115(5)                                                  | 2.118(4); 2.124(4)                                  | 2.120(3); 2.126(4)                                | 2.111(6); 2.121(7)                                                |
| Cd <sub>ext</sub> -N                                 | 2.420(5)                                                            | 2.408(4)                                        | 2.418(5)                                              | 2.454(6)                                                            | 2.401(4)                                            | 2.418(4)                                          | 2.450(7)                                                          |
| Cd <sub>int</sub> -N                                 | 2.356(4)                                                            | 2.348(3)                                        | 2.354(5)                                              | 2.356(5)                                                            | 2.357(4)                                            | 2.363(3)                                          | 2.347(7)                                                          |
| Cd <sub>ext</sub> -X                                 | 2.43(3)/2.6064(11);<br>2.6063(7)                                    | 2.5001(11);<br>2.5028(12)                       | 2.55(4)/2.608(2);<br>2.600(8)                         | 2.31(2)/2.7773(8)<br>2.7733(7)                                      | 2.477(14);<br>2.4801(16)                            | 2.5954(6);<br>2.5994(6)                           | 2.679 (I);<br>2.761(I) <sup>f</sup>                               |
| Cd <sub>ext</sub> -(μ-X)                             | 2.560(16)/2.7929(19);<br>2.7554(7)                                  | 2.6315(10);<br>2.6144(10)                       | 2.552(10)/2.797(3);<br>2.7449(8)                      | 2.7301(17);<br>2.764(12)/2.909(4)                                   | 2.6095(13);<br>2.6393(12)                           | 2.7432(5);<br>2.7984(6)                           | 2.743(2) (Cl);<br>2.8968 (9) (I)                                  |
| Cd <sub>int</sub> -(μ-X)                             | 2.67(2)/ 2.633(3);<br>2.8423(6)                                     | 2.5444(9);<br>2.7050(10)                        | 2.649(13)/2.611(15);<br>2.8351(6)                     | 2.5574(15);<br>2.776(9)/3.013(3)                                    | 2.5375(12);<br>2.6971(11)                           | 2.6457(4);<br>2.8475(5)                           | 2.5631(19) (Cl);<br>2.9899(7) (I)                                 |
| Angles (°)                                           |                                                                     |                                                 |                                                       |                                                                     |                                                     |                                                   |                                                                   |
| N <sub>Xppy</sub> -Ir-N <sub>Xppy</sub>              | 177.5(4); 168.9(3)                                                  | 179.5(3); 168.1(3)                              | 178.1(5); 166.2(4)                                    | 177.3(10); 167.2(11)                                                | 178.7(4); 168.5(3)                                  | 179.1(4); 168.0(3)                                | 169.8(6); 177.6(4)                                                |
| N <sub>L1</sub> -Ir-N <sub>L1</sub>                  | 76.53(16)                                                           | 76.63 (13)                                      | 76.57(18)                                             | 76.91(19)                                                           | 76.85(15)                                           | 76.73(14)                                         | 76.7(2)                                                           |
| N <sub>Xppy</sub> -Ir-C <sub>Xppy</sub> <sup>b</sup> | 80.8                                                                | 80.2                                            | 80.1                                                  | 81.1                                                                | 80.2                                                | 79.7                                              | 80.8                                                              |
| N-Cd <sub>int</sub> -N                               | 180.00(12)                                                          | 180.0                                           | 180.00(19)                                            | 180.0                                                               | 180.0                                               | 180.0                                             | 180.0(3)                                                          |
| N-Cd <sub>int</sub> -(μ-X)                           | 88.4(4)/89.08(12);<br>91.6(4)/90.92(12);<br>91.00(12);<br>89.00(12) | 88.74(9);<br>91.00(9);<br>91.26(9);<br>89.00(9) | 88.144/88.399;<br>91.856/91.600;<br>88.934;<br>91.066 | 91.86(14);<br>88.14(14);<br>89.2(3)/89.23(18);<br>90.8(3)/90.77(18) | 88.85(10);<br>89.32(10);<br>90.68(10);<br>91.15(10) | 88.74(10);<br>89.45(9);<br>90.55(9);<br>91.27(10) | 87.85(19) (Cl);<br>92.15(19) (Cl);<br>89.3(2) (I);<br>90.7(2) (I) |
| N-Cd <sub>ext</sub> -(μ-X)                           | 85.76(12);<br>162.4(5)/164.43(13)                                   | 85.59(9);<br>163.98(9)                          | 85.69(13);<br>161.8(3)/164.543                        | 89.5(2)/84.74(15);<br>165.58(14)                                    | 85.10(11);<br>164.82(12)                            | 85.51(19);<br>164.95(10)                          | 86.50(18) (I);<br>165.6(2) (Cl)                                   |
| N-Cd <sub>ext</sub> -X                               | 85.2(8)/90.87(11);<br>93.67(12)                                     | 90.09(10);<br>93.17(10)                         | 89.0(9)/90.921;<br>94.07(13)                          | 108.4(7)/92.75(14);<br>92.10(14)                                    | 90.90(11);<br>92.92(13)                             | 91.57(9);<br>93.75(10)                            | 91.9;<br>94.8 <sup>f</sup>                                        |
| Miscellaneous                                        |                                                                     |                                                 |                                                       |                                                                     |                                                     |                                                   |                                                                   |
| Cd <sub>int</sub> -Cd <sub>int</sub> (Å)             | 20.584                                                              | 20.407                                          | 20.512                                                | 20.609                                                              | 20.359                                              | 20.535                                            | 20.648                                                            |
| 3py-bpy angle (°) <sup>c</sup>                       | 35.8; 48.0                                                          | 35.5; 47.4                                      | 35.5; 47.8                                            | 34.1; 47.7                                                          | 34.5; 46.8                                          | 35.5; 48.4                                        | 34.0; 47.1                                                        |
| Curvature angle L1 (°) <sup>d</sup>                  | 170.89                                                              | 170.88                                          | 170.53                                                | 169.67                                                              | 171.39                                              | 171.14                                            | 169.51                                                            |
| d <sub>CP-CP</sub> (Å) <sup>e</sup>                  | 17.47                                                               | 17.69                                           | 17.63                                                 | 17.71                                                               | 17.67                                               | 17.68                                             | 17.67                                                             |
| d <sub>planes</sub> (Å) <sup>e</sup>                 | 9.68                                                                | 9.58                                            | 9.65                                                  | 9.71                                                                | 9.67                                                | 9.73                                              | 9.72                                                              |

a) Because of the disorder observed on the positions of the Xppy ligands (statistical presence of Δ and Λ enantiomers), only average Ir-C<sub>Xppy</sub> and Ir-N<sub>Xppy</sub> bond lengths are given; b) The angles given correspond to an average N-Ir-C angle for the N and C atoms belonging to the same Xppy unit; c) The “3py-bpy angle” is defined as highlighted in Scheme S1a; d) The “curvature angle L1” is defined as highlighted in Scheme S1b; e) distance between two Cd atoms Cd<sub>int</sub>-Cd<sub>int</sub> of two parallel coordination polymers, d<sub>CP-CP</sub>, or two distinct planes d<sub>planes</sub> (see Fig. 5); f) Because the monodentate I<sup>-</sup> ligand is disordered over two positions, only average Cd<sub>ext</sub>-I bond lengths and N-Cd<sub>ext</sub>-X angles are given; g) Distances and angles containing Cl atoms are highlighted in green while they are written in black for Br or I.

**Table S6 : Site occupancy for the Xppy ligands in the coordination polymers<sup>a</sup>**

|                  | <b>CP1<sub>Br</sub></b>                  | <b>CP2<sub>Cl</sub></b>                   | <b>CP2<sub>Br</sub></b>                   | <b>CP2<sub>I</sub></b>                    | <b>CP3<sub>Cl</sub></b>                    | <b>CP3<sub>Br</sub></b>                    | <b>CP3<sub>I</sub></b>                     |
|------------------|------------------------------------------|-------------------------------------------|-------------------------------------------|-------------------------------------------|--------------------------------------------|--------------------------------------------|--------------------------------------------|
| Metallatecton    | [Ir(ppy) <sub>2</sub> (L1)] <sup>+</sup> | [Ir(Fppy) <sub>2</sub> (L1)] <sup>+</sup> | [Ir(Fppy) <sub>2</sub> (L1)] <sup>+</sup> | [Ir(Fppy) <sub>2</sub> (L1)] <sup>+</sup> | [Ir(dFppy) <sub>2</sub> (L1)] <sup>+</sup> | [Ir(dFppy) <sub>2</sub> (L1)] <sup>+</sup> | [Ir(dFppy) <sub>2</sub> (L1)] <sup>+</sup> |
| CdX <sub>2</sub> | CdBr <sub>2</sub>                        | CdCl <sub>2</sub>                         | CdBr <sub>2</sub>                         | CdI <sub>2</sub>                          | CdCl <sub>2</sub>                          | CdBr <sub>2</sub>                          | CdI <sub>2</sub>                           |
| Enantiomer 1     | 45.0                                     | 49.2                                      | 45.0                                      | 46.0                                      | 43.6                                       | 47.1                                       | 39.9                                       |
| Enantiomer 2     | 55.0                                     | 50.8                                      | 55.0                                      | 54.0                                      | 56.4                                       | 52.9                                       | 60.1                                       |

<sup>a</sup>Relative ratio of one enantiomer over the other one considering only one complex.

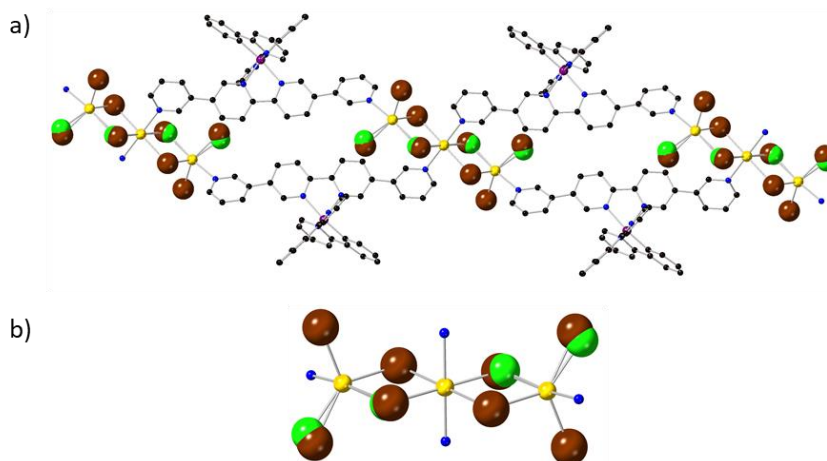

**Fig. S6:** Portions of the X-Ray structures of **CP1<sub>Br</sub>** (a) showing the formation of infinite 1D coordination polymers thanks to the assembly of the cationic metallatecton  $[\text{Ir}(\text{ppy})_2(\mathbf{L1})]^+$  and the trinuclear metallic nodes  $[\text{Cd}_3\text{Cl}_n\text{Br}_{(8-n)}]^{2-}$  ( $n=0$  to 4) represented alongside the respective CP (b) illustrating its behaviour as a 4-four distorted square planar connecting node and showing the mixture of Cl/Br atoms found at some positions of the Cd node. For the sake of clarity, only one enantiomer of the Ir complexes has been arbitrary represented even though a statistical distribution of  $\Delta$  and  $\Lambda$  isomers is observed. H atoms and chloroform solvent molecules have been omitted.

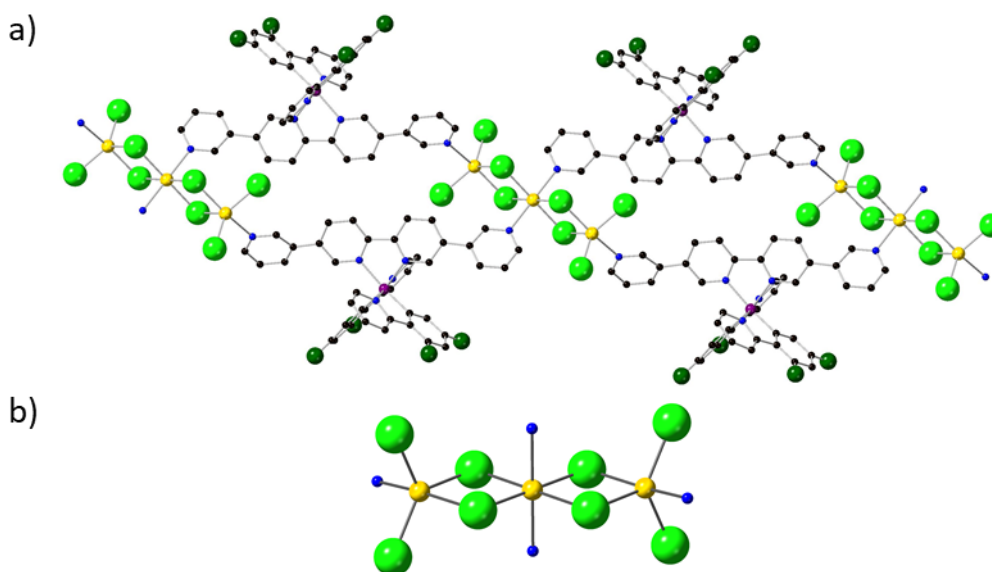

**Fig. S7:** Portions of the X-Ray structures of **CP3<sub>Cl</sub>** (a) showing the formation of infinite 1D coordination polymers thanks to the assembly of the cationic metallatecton  $[\text{Ir}(\text{dFppy})_2(\mathbf{L1})]^+$  and the trinuclear metallic nodes  $[\text{Cd}_3\text{Cl}_8]^{2-}$  represented alongside the respective CP (b) illustrating its behaviour as a 4-four distorted square planar connecting node. For the sake of clarity, only one enantiomer of the Ir complexes has been arbitrary represented even though a statistical distribution of  $\Delta$  and  $\Lambda$  isomers is observed. H atoms and chloroform solvent molecules have been omitted.

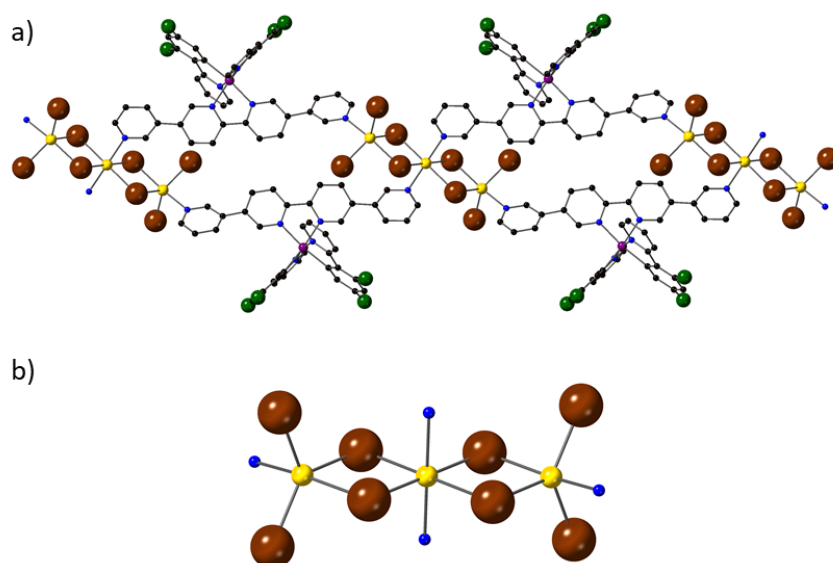

**Fig. S8:** Portions of the X-Ray structures of **CP3<sub>Br</sub>** (a) showing the formation of infinite 1D coordination polymers thanks to the assembly of the cationic metallatecton  $[\text{Ir}(\text{dFppy})_2(\mathbf{L1})]^+$  and the trinuclear metallic nodes  $[\text{Cd}_3\text{Br}_8]^{2-}$  represented alongside the respective CP (b) illustrating its behaviour as a 4-4 distorted square planar connecting node. For the sake of clarity, only one enantiomer of the Ir complexes has been arbitrary represented even though a statistical distribution of  $\Delta$  and  $\Lambda$  isomers is observed. H atoms and chloroform solvent molecules have been omitted. Presence of a mixture of Cl atoms and Br atoms in the trinuclear Cd node is possible as in the case of **CP1<sub>Br</sub>** but this has not been modelled.

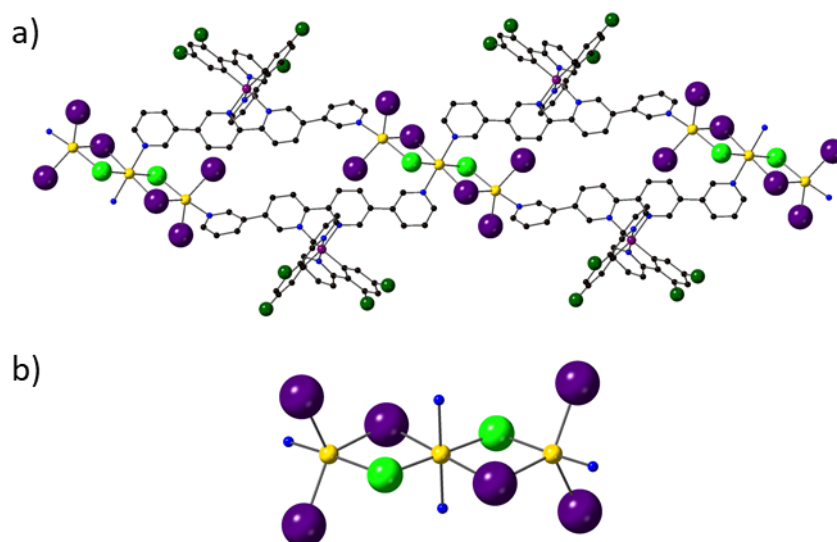

**Fig. S9:** Portions of the X-Ray structures of **CP3<sub>I</sub>** (a) showing the formation of infinite 1D coordination polymers thanks to the assembly of the cationic metallatecton  $[\text{Ir}(\text{dFppy})_2(\mathbf{L1})]^+$  and the trinuclear metallic nodes  $[\text{Cd}_3\text{I}_6\text{Cl}_2]^{2-}$  represented alongside the respective CP (b) illustrating its behaviour as a 4-4 distorted square planar connecting node. For the sake of clarity, only one enantiomer of the Ir complexes has been arbitrary represented even though a statistical distribution of  $\Delta$  and  $\Lambda$  isomers is observed. The two monodentate iodide ligands are disordered over two positions but for clarity reasons, only one position is represented. H atoms and chloroform solvent molecules have been omitted.



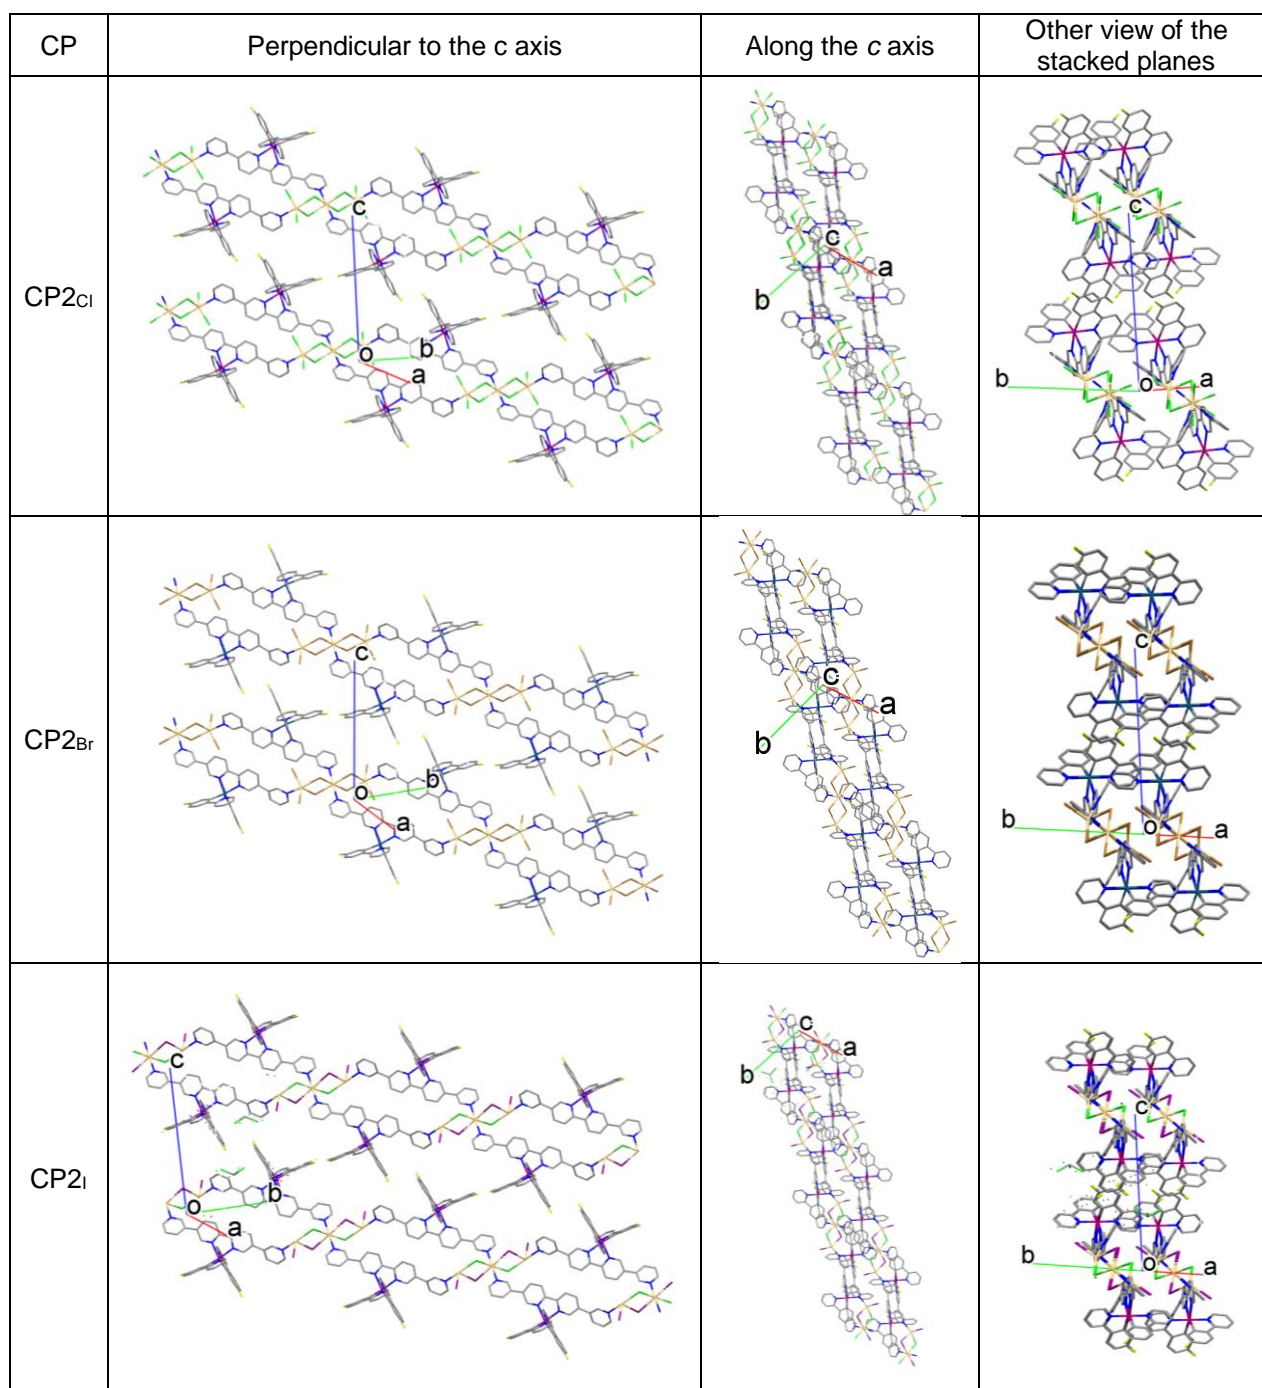

**Fig. S10:** Portions of the X-Ray structures of **CP2<sub>x</sub>** showing the formation of one plane made of parallel 1D coordination polymers represented perpendicular to the *c* axis (a) and stacking of consecutive planes along two distinct directions. For the sake of clarity, only one enantiomer of the Ir complexes has been arbitrary represented even though a statistical distribution of  $\Delta$  and  $\Lambda$  isomers is observed. For **CP2<sub>Br</sub>** and **CP2<sub>I</sub>**, in case of a mixture of Br/I atoms with Cl atoms, only Br/I atoms have been represented and Cl atoms have been omitted within the Cd trinuclear node for clarity

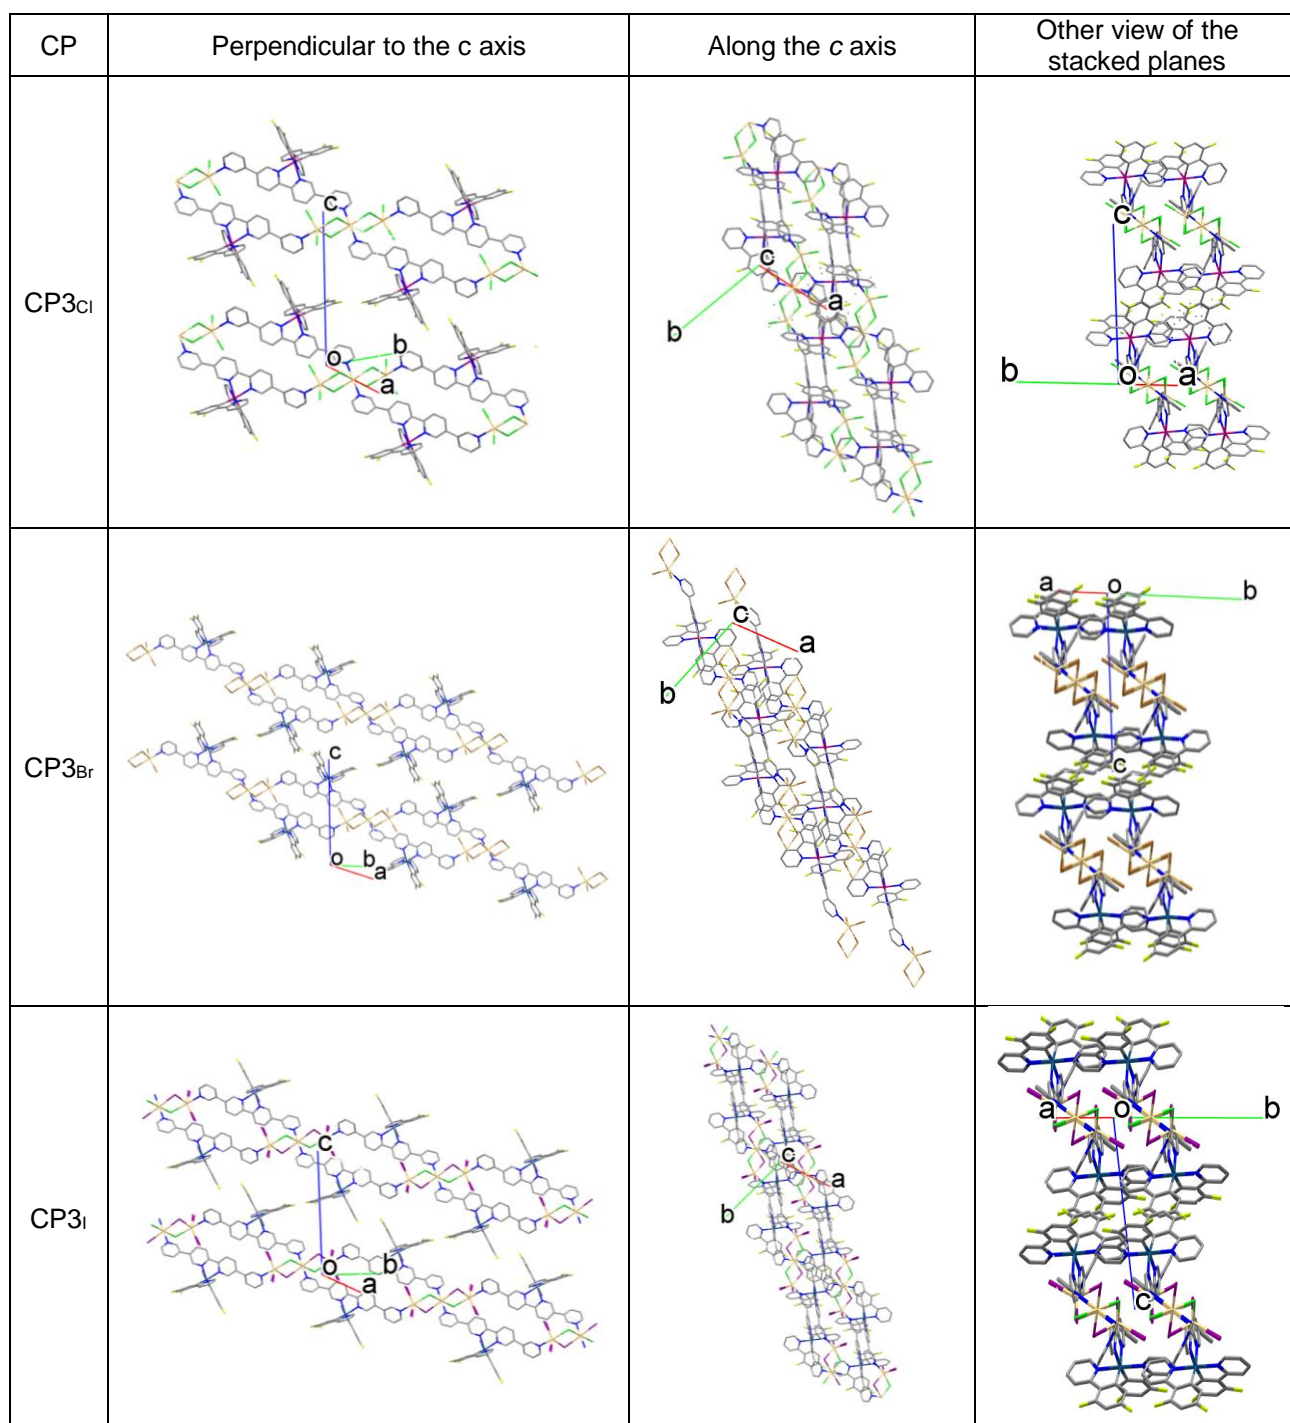

**Fig. S11:** Portions of the X-Ray structures of **CP3<sub>x</sub>** showing the formation of one plane made of parallel 1D coordination polymers represented perpendicular to the *c* axis (a) and stacking of consecutive planes along two distinct directions. For the sake of clarity, only one enantiomer of the Ir complexes has been arbitrary represented even though a statistical distribution of  $\Delta$  and  $\Lambda$  isomers is observed. H atoms and chloroform solvent molecules have been omitted.

## References

1. G. Sheldrick, *Acta Crystallogr., Sect. A*, 2008, **64**, 112-122.
2. G. M. Sheldrick, *Acta Crystallogr., Sect. C*, 2015, **71**, 3-8.
3. A. J. Paterson, S. St John-Campbell, M. F. Mahon, N. J. Press and C. G. Frost, *Chem. Commun.*, 2015, **51**, 12807-12810.
4. J.-F. Ayme, J. E. Beves, D. A. Leigh, R. T. McBurney, K. Rissanen and D. Schultz, *Nat Chem*, 2012, **4**, 15-20.
5. S. Sprouse, K. A. King, P. J. Spellane and R. J. Watts, *J. Am. Chem. Soc.*, 1984, **106**, 6647-6653.
6. Y. You and S. Y. Park, *J. Am. Chem. Soc.*, 2005, **127**, 12438-12439.
7. L. L. Tinker and S. Bernhard, *Inorg. Chem.*, 2009, **48**, 10507-10511.
8. C. Xu, A. Guenet, N. Kyritsakas, J.-M. Planeix and M. W. Hosseini, *Inorg. Chem.*, 2015, **54**, 10429-10439.
9. H. Iranmanesh, K. S. A. Arachchige, M. Bhadbhade, W. A. Donald, J. Y. Liew, K. T. C. Liu, E. T. Luis, E. G. Moore, J. R. Price, H. Yan, J. Yang and J. E. Beves, *Inorg. Chem.*, 2016, **55**, 12737-12751.
10. G. E. Schneider, H. J. Bolink, E. C. Constable, C. D. Ertl, C. E. Housecroft, A. Pertegas, J. A. Zampese, A. Kanitz, F. Kessler and S. B. Meier, *Dalton Trans.*, 2014, **43**, 1961-1964.
11. C. Xu, A. Guenet, N. Kyritsakas, J.-M. Planeix and M. W. Hosseini, *Chem. Commun.*, 2015, **51**, 14785-14788.
